# Supplementary material
Source: HighWire-hosted journal article supplement (https://thorax.bmj.com/content/thoraxjnl-2019-213561)
Supplement: inline-supplementary-material-2 [file inline-supplementary-material-2.pdf]

| miRNA           | ProbeID      | GeneSymbol    | Pvalue    |
|-----------------|--------------|---------------|-----------|
| mmu.miR.20b     | ILMN_2522023 | Tusc2         | 3.77E-229 |
| mmu.miR.93      | ILMN_2834451 | Tusc2         | 6.81E-228 |
| mmu.miR.340.5p  | ILMN_2630512 | Rsrc1         | 9.18E-221 |
| mmu.miR.20b     | ILMN_2812164 | Irak4         | 1.10E-198 |
| mmu.miR.27a     | ILMN_2630512 | Rsrc1         | 9.18E-191 |
| mmu.miR.17      | ILMN_2812164 | Irak4         | 1.75E-189 |
| mmu.miR.705     | ILMN_1222333 | Slc2a4        | 8.52E-174 |
| mmu.miR.27a     | ILMN_1227993 | Vav3          | 1.27E-161 |
| mmu.miR.339.5p  | ILMN_1227610 | Rcan3         | 4.23E-152 |
| mmu.miR.290.3p  | ILMN_1242945 | Ptpn3         | 1.54E-149 |
| mmu.miR.881     | ILMN_1224022 | E130308A19Rik | 2.43E-140 |
| mmu.miR.23a     | ILMN_2834451 | Tusc2         | 8.92E-132 |
| mmu.miR.146a    | ILMN_2630512 | Rsrc1         | 2.20E-131 |
| mmu.miR.186     | ILMN_2630512 | Rsrc1         | 3.19E-131 |
| mmu.miR.23b     | ILMN_2834451 | Tusc2         | 5.45E-128 |
| mmu.miR.466m.3p | ILMN_2672289 | Ptpn3         | 9.58E-127 |
| mmu.miR.23b     | ILMN_2522023 | Tusc2         | 4.22E-125 |
| mmu.miR.200c    | ILMN_3060538 | E130308A19Rik | 6.14E-125 |
| mmu.miR.290.3p  | ILMN_2885922 | Ptpn3         | 6.38E-116 |
| mmu.miR.338.3p  | ILMN_1222226 | Vav3          | 5.98E-109 |
| mmu.miR.691     | ILMN_1227993 | Vav3          | 1.00E-106 |
| mmu.miR.340.5p  | ILMN_1227993 | Vav3          | 3.17E-96  |
| mmu.miR.1839.3p | ILMN_1219661 | Cog6          | 2.55E-92  |
| mmu.miR.351     | ILMN_2672289 | Ptpn3         | 9.69E-85  |
| mmu.miR.17      | ILMN_2522023 | Tusc2         | 2.41E-83  |
| mmu.miR.93      | ILMN_2522023 | Tusc2         | 1.37E-82  |
| mmu.miR.709     | ILMN_2748336 | Elf2          | 8.42E-79  |
| mmu.miR.181a    | ILMN_1242555 | Asxl3         | 1.39E-74  |
| mmu.miR.106a    | ILMN_2834451 | Tusc2         | 1.53E-60  |
| mmu.miR.27a     | ILMN_1222226 | Vav3          | 2.02E-59  |
| mmu.miR.29a     | ILMN_2748336 | Elf2          | 2.82E-58  |
| mmu.miR.194     | ILMN_2658067 | 1700001L19Rik | 2.33E-56  |
| mmu.miR.93      | ILMN_1219661 | Cog6          | 7.20E-56  |
| mmu.miR.92b     | ILMN_2660650 | Kif5b         | 7.31E-54  |
| mmu.miR.93      | ILMN_1227610 | Rcan3         | 6.72E-53  |
| mmu.miR.664     | ILMN_2707694 | D10Wsu102e    | 1.30E-52  |
| mmu.miR.30e     | ILMN_2637156 | Fpgt          | 7.35E-52  |
| mmu.miR.27b     | ILMN_3060538 | E130308A19Rik | 1.43E-51  |
| mmu.miR.322     | ILMN_2672289 | Ptpn3         | 4.42E-49  |
| mmu.miR.342.3p  | ILMN_2630512 | Rsrc1         | 7.73E-49  |
| mmu.miR.181a    | ILMN_1240804 | Asxl3         | 1.65E-47  |
| mmu.let.7b      | ILMN_2973115 | Ngly1         | 1.12E-46  |
| mmu.miR.881     | ILMN_3060538 | E130308A19Rik | 1.47E-46  |
| mmu.miR.1892    | ILMN_1242945 | Ptpn3         | 6.86E-46  |
| mmu.miR.487b    | ILMN_1219661 | Cog6          | 2.28E-44  |
| mmu.miR.27b     | ILMN_1224022 | E130308A19Rik | 1.02E-42  |
| mmu.miR.20b     | ILMN_1227610 | Rcan3         | 1.68E-41  |
| mmu.miR.290.3p  | ILMN_2672289 | Ptpn3         | 3.16E-41  |

|                 |              |               |          |
|-----------------|--------------|---------------|----------|
| mmu.miR.20b     | ILMN_2658067 | 1700001L19Rik | 8.37E-38 |
| mmu.miR.3474    | ILMN_2522023 | Tusc2         | 1.62E-36 |
| mmu.miR.329     | ILMN_1242555 | Asxl3         | 4.13E-36 |
| mmu.miR.1196    | ILMN_1257394 | Rundc1        | 4.63E-36 |
| mmu.miR.351     | ILMN_1242945 | Ptpn3         | 1.11E-35 |
| mmu.miR.142.5p  | ILMN_3060538 | E130308A19Rik | 4.84E-35 |
| mmu.miR.93      | ILMN_1257394 | Rundc1        | 4.26E-34 |
| mmu.miR.196b    | ILMN_2973115 | Ngly1         | 5.55E-34 |
| mmu.miR.20a     | ILMN_1257394 | Rundc1        | 7.24E-34 |
| mmu.miR.20a     | ILMN_1227610 | Rcan3         | 1.08E-32 |
| mmu.miR.142.5p  | ILMN_1224022 | E130308A19Rik | 7.34E-32 |
| mmu.miR.1186    | ILMN_2834451 | Tusc2         | 1.08E-31 |
| mmu.let.7f      | ILMN_1226152 | Alkbh4        | 6.76E-31 |
| mmu.miR.337.3p  | ILMN_3096144 | Stat3         | 1.15E-30 |
| mmu.miR.340.5p  | ILMN_3060538 | E130308A19Rik | 1.72E-29 |
| mmu.miR.466i.3p | ILMN_1227993 | Vav3          | 1.27E-28 |
| mmu.miR.3103    | ILMN_2748336 | Elf2          | 1.30E-28 |
| mmu.miR.1264.3p | ILMN_1214142 | Hcrr2         | 1.92E-28 |
| mmu.miR.145     | ILMN_1235783 | Acbd3         | 2.14E-28 |
| mmu.miR.326     | ILMN_1231408 | Ngfr          | 2.42E-27 |
| mmu.miR.1192    | ILMN_3060538 | E130308A19Rik | 3.93E-27 |
| mmu.miR.103     | ILMN_1235783 | Acbd3         | 2.98E-26 |
| mmu.miR.466m.3p | ILMN_1227993 | Vav3          | 6.77E-26 |
| mmu.miR.1192    | ILMN_3096144 | Stat3         | 1.53E-24 |
| mmu.miR.31      | ILMN_2637156 | Fpgt          | 4.55E-24 |
| mmu.miR.195     | ILMN_1242945 | Ptpn3         | 4.61E-24 |
| mmu.let.7g      | ILMN_1226152 | Alkbh4        | 8.02E-24 |
| mmu.miR.1192    | ILMN_2637156 | Fpgt          | 9.13E-24 |
| mmu.miR.106a    | ILMN_1227610 | Rcan3         | 1.07E-23 |
| mmu.miR.3069.5p | ILMN_2658067 | 1700001L19Rik | 1.15E-23 |
| mmu.miR.142.5p  | ILMN_2486600 | 2810008M24Rik | 2.02E-23 |
| mmu.miR.186     | ILMN_1227610 | Rcan3         | 2.40E-23 |
| mmu.miR.669h.3p | ILMN_2748336 | Elf2          | 9.70E-23 |
| mmu.miR.339.5p  | ILMN_2707694 | D10Wsu102e    | 1.26E-22 |
| mmu.miR.691     | ILMN_2707694 | D10Wsu102e    | 2.31E-22 |
| mmu.miR.194     | ILMN_1235783 | Acbd3         | 5.23E-22 |
| mmu.miR.106b    | ILMN_1220401 | Gtf2h2        | 8.33E-22 |
| mmu.miR.92b     | ILMN_1235783 | Acbd3         | 3.86E-21 |
| mmu.miR.335.3p  | ILMN_2660650 | Kif5b         | 4.14E-21 |
| mmu.miR.133b    | ILMN_2637156 | Fpgt          | 4.40E-21 |
| mmu.miR.20a     | ILMN_1220401 | Gtf2h2        | 1.68E-20 |
| mmu.miR.466m.3p | ILMN_2885922 | Ptpn3         | 1.47E-19 |
| mmu.miR.181b    | ILMN_1250088 | 4921524J17Rik | 1.79E-19 |
| mmu.miR.29b     | ILMN_2748336 | Elf2          | 2.44E-19 |
| mmu.miR.30b     | ILMN_3002943 | Tmed10        | 2.76E-19 |
| mmu.miR.200c    | ILMN_1224022 | E130308A19Rik | 5.77E-19 |
| mmu.miR.195     | ILMN_2672289 | Ptpn3         | 8.32E-19 |
| mmu.miR.322     | ILMN_2885922 | Ptpn3         | 8.89E-19 |
| mmu.miR.106b    | ILMN_1227610 | Rcan3         | 1.45E-18 |

|                 |              |               |          |
|-----------------|--------------|---------------|----------|
| mmu.miR.20a     | ILMN_1250241 | Csmd3         | 1.58E-18 |
| mmu.miR.669i    | ILMN_2748336 | Elf2          | 6.34E-18 |
| mmu.miR.466a.5p | ILMN_2486600 | 2810008M24Rik | 1.57E-17 |
| mmu.miR.155     | ILMN_1235783 | Acbd3         | 1.58E-17 |
| mmu.miR.224     | ILMN_1250088 | 4921524J17Rik | 1.96E-17 |
| mmu.miR.98      | ILMN_2973115 | Ngly1         | 2.88E-17 |
| mmu.miR.106b    | ILMN_2910295 | Crim1         | 1.02E-16 |
| mmu.miR.133a    | ILMN_2637156 | Fpgt          | 1.81E-16 |
| mmu.miR.106b    | ILMN_2812164 | Irak4         | 1.91E-16 |
| mmu.miR.770.3p  | ILMN_1239921 | Man1b1        | 4.87E-16 |
| mmu.miR.302a    | ILMN_1222333 | Slc2a4        | 1.37E-15 |
| mmu.miR.329     | ILMN_1242945 | Ptpn3         | 1.38E-15 |
| mmu.miR.1892    | ILMN_2658067 | 1700001L19Rik | 1.91E-15 |
| mmu.miR.5097    | ILMN_3060538 | E130308A19Rik | 2.03E-15 |
| mmu.miR.5097    | ILMN_1224022 | E130308A19Rik | 4.41E-15 |
| mmu.miR.142.5p  | ILMN_1227993 | Vav3          | 1.00E-14 |
| mmu.miR.20b     | ILMN_1220401 | Gtf2h2        | 2.34E-14 |
| mmu.miR.1192    | ILMN_2486600 | 2810008M24Rik | 3.56E-14 |
| mmu.miR.337.3p  | ILMN_2640441 | Hdac2         | 4.46E-14 |
| mmu.miR.15b     | ILMN_2885922 | Ptpn3         | 6.72E-14 |
| mmu.miR.466d.5p | ILMN_1238878 | Hephl1        | 9.39E-14 |
| mmu.miR.709     | ILMN_2626318 | Elf2          | 1.01E-13 |
| mmu.miR.106b    | ILMN_2619136 | Pthlh         | 1.15E-13 |
| mmu.miR.15b     | ILMN_2672289 | Ptpn3         | 1.75E-13 |
| mmu.miR.3072    | ILMN_2885922 | Ptpn3         | 1.76E-13 |
| mmu.miR.106b    | ILMN_1219661 | Cog6          | 1.85E-13 |
| mmu.miR.125a.5p | ILMN_1231408 | Ngfr          | 2.15E-13 |
| mmu.miR.125b.5p | ILMN_1231408 | Ngfr          | 2.16E-13 |
| mmu.miR.142.5p  | ILMN_2950721 | 2810008M24Rik | 2.44E-13 |
| mmu.miR.93      | ILMN_2910295 | Crim1         | 2.74E-13 |
| mmu.miR.770.3p  | ILMN_1241611 | Zfp39         | 2.81E-13 |
| mmu.miR.30c     | ILMN_1252111 | Arl6ip5       | 2.42E-12 |
| mmu.miR.20b     | ILMN_2714565 | Rrm2          | 3.99E-12 |
| mmu.miR.20b     | ILMN_2619136 | Pthlh         | 4.76E-12 |
| mmu.miR.3098.3p | ILMN_2524276 | 6430704M03Rik | 5.30E-12 |
| mmu.miR.17      | ILMN_2714565 | Rrm2          | 5.86E-12 |
| mmu.miR.1192    | ILMN_2950721 | 2810008M24Rik | 6.35E-12 |
| mmu.miR.207     | ILMN_2524276 | 6430704M03Rik | 9.61E-12 |
| mmu.miR.122     | ILMN_2624544 | Helb          | 1.16E-11 |
| mmu.miR.429     | ILMN_2707694 | D10Wsu102e    | 1.29E-11 |
| mmu.miR.3084    | ILMN_2524276 | 6430704M03Rik | 1.78E-11 |
| mmu.miR.429     | ILMN_1257394 | Rundc1        | 4.18E-11 |
| mmu.miR.466a.5p | ILMN_1242007 | Gtf2h2        | 1.39E-10 |
| mmu.miR.30d     | ILMN_1252111 | Arl6ip5       | 1.60E-10 |
| mmu.miR.29c     | ILMN_2748336 | Elf2          | 1.98E-10 |
| mmu.miR.691     | ILMN_2669991 | Tmem135       | 2.66E-10 |
| mmu.miR.125a.3p | ILMN_1239801 | Irf2bp2       | 3.69E-10 |
| mmu.miR.30e     | ILMN_1252111 | Arl6ip5       | 3.92E-10 |
| mmu.miR.1192    | ILMN_1224022 | E130308A19Rik | 5.00E-10 |

|                 |              |               |          |
|-----------------|--------------|---------------|----------|
| mmu.miR.29a     | ILMN_2626318 | Elf2          | 5.30E-10 |
| mmu.miR.706     | ILMN_1240804 | Asxl3         | 6.98E-10 |
| mmu.miR.710     | ILMN_2662456 | Ppm1l         | 7.14E-10 |
| mmu.miR.467h    | ILMN_1241611 | Zfp39         | 8.59E-10 |
| mmu.miR.2861    | ILMN_1237974 | Kcng3         | 9.20E-10 |
| mmu.miR.101b    | ILMN_2464898 | Amz2          | 9.56E-10 |
| mmu.miR.31      | ILMN_1222333 | Slc2a4        | 9.67E-10 |
| mmu.miR.20a     | ILMN_2653633 | Csmd3         | 2.03E-09 |
| mmu.miR.466f    | ILMN_1238878 | Hephl1        | 2.84E-09 |
| mmu.miR.149     | ILMN_2524276 | 6430704M03Rik | 2.93E-09 |
| mmu.miR.351     | ILMN_2885922 | Ptpn3         | 4.41E-09 |
| mmu.miR.706     | ILMN_1217023 | Asxl3         | 5.38E-09 |
| mmu.miR.329     | ILMN_2885922 | Ptpn3         | 5.73E-09 |
| mmu.miR.3072    | ILMN_1238878 | Hephl1        | 7.13E-09 |
| mmu.miR.669n    | ILMN_2662456 | Ppm1l         | 7.53E-09 |
| mmu.miR.532.3p  | ILMN_2834451 | Tusc2         | 7.66E-09 |
| mmu.miR.195     | ILMN_1236150 | Ap3b1         | 8.38E-09 |
| mmu.miR.337.3p  | ILMN_1231408 | Ngfr          | 8.45E-09 |
| mmu.miR.92b     | ILMN_2653633 | Csmd3         | 9.16E-09 |
| mmu.miR.877     | ILMN_2812164 | Irak4         | 9.81E-09 |
| mmu.miR.762     | ILMN_1247131 | 2310044H10Rik | 1.06E-08 |
| mmu.miR.335.3p  | ILMN_1237003 | Slu7          | 1.11E-08 |
| mmu.miR.30d     | ILMN_1239921 | Man1b1        | 1.11E-08 |
| mmu.miR.875.3p  | ILMN_1250088 | 4921524J17Rik | 1.62E-08 |
| mmu.let.7e      | ILMN_2973115 | Ngly1         | 1.72E-08 |
| mmu.miR.762     | ILMN_2619922 | Phkg2         | 1.88E-08 |
| mmu.miR.144     | ILMN_2619136 | Pthlh         | 2.25E-08 |
| mmu.miR.497     | ILMN_1236150 | Ap3b1         | 2.30E-08 |
| mmu.miR.3102    | ILMN_1250088 | 4921524J17Rik | 2.99E-08 |
| mmu.miR.337.3p  | ILMN_2589790 | Stat3         | 3.04E-08 |
| mmu.miR.335.3p  | ILMN_1242555 | Asxl3         | 4.76E-08 |
| mmu.miR.20a     | ILMN_1239801 | Irf2bp2       | 5.00E-08 |
| mmu.miR.186     | ILMN_2950721 | 2810008M24Rik | 5.14E-08 |
| mmu.miR.20b     | ILMN_2732695 | Rcan3         | 5.48E-08 |
| mmu.miR.20a     | ILMN_1241630 | Spinlw1       | 6.59E-08 |
| mmu.miR.2183    | ILMN_2733843 | Dmrt1         | 6.66E-08 |
| mmu.miR.1894.3p | ILMN_1227610 | Rcan3         | 7.53E-08 |
| mmu.miR.30a     | ILMN_2761152 | Ptpn13        | 9.40E-08 |
| mmu.miR.30e     | ILMN_1216110 | Slc35d3       | 1.13E-07 |
| mmu.miR.338.5p  | ILMN_1216110 | Slc35d3       | 1.16E-07 |
| mmu.miR.34b.5p  | ILMN_2950721 | 2810008M24Rik | 1.25E-07 |
| mmu.miR.3069.5p | ILMN_2662456 | Ppm1l         | 1.38E-07 |
| mmu.miR.30e     | ILMN_1239921 | Man1b1        | 1.68E-07 |
| mmu.miR.335.3p  | ILMN_1220401 | Gtf2h2        | 1.74E-07 |
| mmu.miR.1903    | ILMN_1237974 | Kcng3         | 1.93E-07 |
| mmu.miR.322     | ILMN_1242945 | Ptpn3         | 2.29E-07 |
| mmu.miR.106a    | ILMN_1219661 | Cog6          | 2.32E-07 |
| mmu.miR.223     | ILMN_2950721 | 2810008M24Rik | 2.58E-07 |
| mmu.miR.125a.5p | ILMN_1260455 | Lhx3          | 2.65E-07 |

|                  |              |               |          |
|------------------|--------------|---------------|----------|
| mmu.miR.194      | ILMN_1224792 | Sltm          | 2.93E-07 |
| mmu.miR.106b     | ILMN_1249922 | Ppp1r3e       | 3.30E-07 |
| mmu.miR.290.3p   | ILMN_1237917 | Sparcl1       | 3.39E-07 |
| mmu.miR.101b     | ILMN_2466926 | Zfp235        | 3.51E-07 |
| mmu.miR.150      | ILMN_2683528 | Gdpd1         | 3.51E-07 |
| mmu.miR.200a     | ILMN_1227250 | Specc1l       | 3.82E-07 |
| mmu.miR.125b.5p  | ILMN_1233160 | Triap1        | 3.85E-07 |
| mmu.miR.466i.5p  | ILMN_1231553 | Bdh1          | 4.08E-07 |
| mmu.miR.5097     | ILMN_1220401 | Gtf2h2        | 4.81E-07 |
| mmu.miR.1958     | ILMN_1254558 | Rab23         | 5.35E-07 |
| mmu.miR.1929     | ILMN_1257394 | Rundc1        | 5.42E-07 |
| mmu.miR.15a      | ILMN_1236150 | Ap3b1         | 7.15E-07 |
| mmu.let.7c       | ILMN_2973115 | Ngly1         | 7.34E-07 |
| mmu.miR.882      | ILMN_1231408 | Ngfr          | 8.19E-07 |
| mmu.miR.712      | ILMN_1238614 | Hsd17b10      | 1.06E-06 |
| mmu.miR.17       | ILMN_2910295 | Crim1         | 1.30E-06 |
| mmu.miR.20b      | ILMN_1219661 | Cog6          | 1.53E-06 |
| mmu.miR.3474     | ILMN_2895364 | Ext2          | 1.62E-06 |
| mmu.miR.712      | ILMN_2707694 | D10Wsu102e    | 1.66E-06 |
| mmu.miR.883a.5p  | ILMN_2466926 | Zfp235        | 1.70E-06 |
| mmu.miR.3096.3p  | ILMN_2658067 | 1700001L19Rik | 1.78E-06 |
| mmu.miR.186      | ILMN_1224213 | Gal3st3       | 1.92E-06 |
| mmu.miR.429      | ILMN_1224022 | E130308A19Rik | 2.30E-06 |
| mmu.miR.762      | ILMN_2687372 | Hectd3        | 2.33E-06 |
| mmu.miR.669n     | ILMN_2863060 | Ccdc109a      | 2.56E-06 |
| mmu.miR.93       | ILMN_2974945 | Cog6          | 2.68E-06 |
| mmu.miR.466m.3p  | ILMN_1219661 | Cog6          | 2.70E-06 |
| mmu.miR.30b      | ILMN_2537125 | Dock7         | 2.73E-06 |
| mmu.miR.374      | ILMN_1214142 | Hctr2         | 2.89E-06 |
| mmu.miR.374      | ILMN_3132318 | Rgs3          | 2.96E-06 |
| mmu.miR.23a      | ILMN_2522023 | Tusc2         | 3.15E-06 |
| mmu.miR.125b.5p  | ILMN_1260455 | Lhx3          | 3.24E-06 |
| mmu.miR.709      | ILMN_1251296 | Elf2          | 3.33E-06 |
| mmu.miR.150      | ILMN_2466926 | Zfp235        | 3.54E-06 |
| mmu.miR.20a      | ILMN_1245103 | G6pc          | 3.80E-06 |
| mmu.miR.10b      | ILMN_2532423 | 1700039E15Rik | 4.24E-06 |
| mmu.miR.325      | ILMN_3102085 | Plekha4       | 4.33E-06 |
| mmu.miR.340.5p   | ILMN_2637156 | Fpgt          | 4.58E-06 |
| mmu.miR.25       | ILMN_2660650 | Kif5b         | 5.25E-06 |
| mmu.miR.126.5p   | ILMN_2610679 | Rgs3          | 5.59E-06 |
| mmu.miR.762      | ILMN_2791059 | Cltb          | 6.00E-06 |
| mmu.miR.423.5p   | ILMN_2734283 | Slc25a44      | 6.62E-06 |
| mmu.miR.762      | ILMN_2767605 | Lmo2          | 6.66E-06 |
| mmu.miR.1958     | ILMN_2464898 | Amz2          | 6.79E-06 |
| mmu.miR.497      | ILMN_2610861 | Ap3b1         | 7.06E-06 |
| mmu.miR.126.5p   | ILMN_3060966 | Als2cr4       | 7.68E-06 |
| mmu.miR.883b.5p  | ILMN_1226962 | 1300010F03Rik | 7.68E-06 |
| mmu.miR.129.1.3p | ILMN_1249821 | Ccdc47        | 8.33E-06 |
| mmu.miR.142.5p   | ILMN_2910295 | Crim1         | 8.38E-06 |

|                 |              |               |          |
|-----------------|--------------|---------------|----------|
| mmu.miR.1839.3p | ILMN_2974945 | Cog6          | 9.05E-06 |
| mmu.miR.93      | ILMN_2812164 | Irak4         | 9.15E-06 |
| mmu.miR.1958    | ILMN_2643648 | Dbc1          | 9.31E-06 |
| mmu.miR.505.5p  | ILMN_1243488 | Abca3         | 1.02E-05 |
| mmu.miR.1892    | ILMN_2648746 | Bckdk         | 1.08E-05 |
| mmu.miR.1949    | ILMN_3060538 | E130308A19Rik | 1.10E-05 |
| mmu.miR.200b    | ILMN_2819319 | Rrm2          | 1.10E-05 |
| mmu.miR.466e.5p | ILMN_1228567 | Pknx2         | 1.11E-05 |
| mmu.miR.374     | ILMN_1239801 | Irf2bp2       | 1.17E-05 |
| mmu.miR.1894.3p | ILMN_2686348 | Pknx2         | 1.18E-05 |
| mmu.miR.101a    | ILMN_2466926 | Zfp235        | 1.23E-05 |
| mmu.miR.497     | ILMN_1238878 | Heph1         | 1.28E-05 |
| mmu.miR.1892    | ILMN_1228567 | Pknx2         | 1.31E-05 |
| mmu.miR.351     | ILMN_1233160 | Triap1        | 1.38E-05 |
| mmu.miR.186     | ILMN_2669416 | Mgst1         | 1.40E-05 |
| mmu.let.7a      | ILMN_2973115 | Ngly1         | 1.42E-05 |
| mmu.miR.466a.5p | ILMN_1228567 | Pknx2         | 1.47E-05 |
| mmu.miR.668     | ILMN_1250088 | 4921524J17Rik | 1.48E-05 |
| mmu.miR.668     | ILMN_3149680 | Fbxl12        | 1.54E-05 |
| mmu.miR.322     | ILMN_2636143 | lfnk          | 1.55E-05 |
| mmu.miR.222     | ILMN_3009184 | Ap3b2         | 1.55E-05 |
| mmu.miR.467e    | ILMN_1232081 | Cald1         | 1.62E-05 |
| mmu.miR.3103    | ILMN_2626318 | Elf2          | 1.62E-05 |
| mmu.miR.3072    | ILMN_1242945 | Ptpn3         | 1.67E-05 |
| mmu.miR.17      | ILMN_1250241 | Csmd3         | 1.68E-05 |
| mmu.miR.1958    | ILMN_1224213 | Gal3st3       | 1.74E-05 |
| mmu.miR.875.3p  | ILMN_3157399 | Tead4         | 1.74E-05 |
| mmu.miR.93      | ILMN_1245103 | G6pc          | 1.75E-05 |
| mmu.miR.30b     | ILMN_1252111 | Arl6ip5       | 1.93E-05 |
| mmu.miR.125a.3p | ILMN_1220547 | Styx11        | 1.95E-05 |
| mmu.miR.297c    | ILMN_1250359 | Ebag9         | 1.99E-05 |
| mmu.miR.487b    | ILMN_2974945 | Cog6          | 2.03E-05 |
| mmu.miR.669n    | ILMN_1242390 | Actn4         | 2.11E-05 |
| mmu.miR.322     | ILMN_2605756 | Klc1          | 2.21E-05 |
| mmu.miR.338.5p  | ILMN_2777270 | Pfdn4         | 2.29E-05 |
| mmu.miR.29a     | ILMN_2700797 | Ppic          | 2.33E-05 |
| mmu.miR.3082.5p | ILMN_3002943 | Tmed10        | 2.46E-05 |
| mmu.miR.677     | ILMN_3001313 | Trpc3         | 2.50E-05 |
| mmu.miR.695     | ILMN_2713491 | Hist1h1e      | 2.51E-05 |
| mmu.miR.20b     | ILMN_1259672 | Pdzd7         | 2.52E-05 |
| mmu.miR.92b     | ILMN_2628699 | Vmn2r81       | 2.63E-05 |
| mmu.miR.340.5p  | ILMN_1222226 | Vav3          | 2.67E-05 |
| mmu.miR.693.5p  | ILMN_2750062 | Arhgap24      | 2.95E-05 |
| mmu.miR.1894.3p | ILMN_2594672 | Fads3         | 3.07E-05 |
| mmu.miR.144     | ILMN_2640441 | Hdac2         | 3.09E-05 |
| mmu.miR.762     | ILMN_2725595 | Thra          | 3.17E-05 |
| mmu.miR.3095.3p | ILMN_1217023 | Asxl3         | 3.31E-05 |
| mmu.let.7a      | ILMN_1226152 | Alkbh4        | 3.44E-05 |
| mmu.miR.152     | ILMN_2662456 | Ppm1l         | 4.08E-05 |

|                 |              |               |             |
|-----------------|--------------|---------------|-------------|
| mmu.miR.677     | ILMN_1255849 | Zdhhc13       | 4.15E-05    |
| mmu.miR.10b     | ILMN_2740134 | Idh3a         | 4.27E-05    |
| mmu.miR.205     | ILMN_1252111 | Arl6ip5       | 4.53E-05    |
| mmu.miR.1897.5p | ILMN_1231553 | Bdh1          | 4.66E-05    |
| mmu.miR.466a.5p | ILMN_1252745 | Gtf2h2        | 4.75E-05    |
| mmu.miR.1264.3p | ILMN_1215679 | Ppp2r3c       | 4.91E-05    |
| mmu.miR.875.3p  | ILMN_1250241 | Csmd3         | 5.05E-05    |
| mmu.miR.196b    | ILMN_1249821 | Ccdc47        | 5.12E-05    |
| mmu.miR.126.5p  | ILMN_1236150 | Ap3b1         | 5.28E-05    |
| mmu.miR.20b     | ILMN_2974945 | Cog6          | 5.41E-05    |
| mmu.miR.875.3p  | ILMN_2653633 | Csmd3         | 5.91E-05    |
| mmu.miR.669n    | ILMN_1214738 | Snopc3        | 5.93E-05    |
| mmu.miR.3082.5p | ILMN_2473337 | Tmed10        | 6.37E-05    |
| mmu.miR.126.5p  | ILMN_2610861 | Ap3b1         | 6.41E-05    |
| mmu.miR.194     | ILMN_1216110 | Slc35d3       | 6.78E-05    |
| mmu.miR.668     | ILMN_2648746 | Bckdk         | 7.26E-05    |
| mmu.miR.335.3p  | ILMN_2630512 | Rsrc1         | 7.40E-05    |
| mmu.miR.148b    | ILMN_3158060 | Epn2          | 7.85E-05    |
| mmu.miR.466i.5p | ILMN_2792502 | Il17d         | 8.37E-05    |
| mmu.miR.374     | ILMN_2524276 | 6430704M03Rik | 8.44E-05    |
| mmu.miR.101a    | ILMN_1224792 | Sltm          | 8.68E-05    |
| mmu.miR.15b     | ILMN_1242945 | Ptpn3         | 8.80E-05    |
| mmu.miR.1934    | ILMN_2907721 | Tmem17        | 8.88E-05    |
| mmu.miR.122     | ILMN_3129337 | Slc25a34      | 9.28E-05    |
| mmu.miR.34a     | ILMN_2950721 | 2810008M24Rik | 9.37E-05    |
| mmu.miR.125a.5p | ILMN_2644175 | P4ha3         | 9.45E-05    |
| mmu.miR.497     | ILMN_2672289 | Ptpn3         | 9.65E-05    |
| mmu.miR.142.3p  | ILMN_2792502 | Il17d         | 9.65E-05    |
| mmu.miR.20a     | ILMN_3096144 | Stat3         | 0.000106623 |
| mmu.miR.29c     | ILMN_1217023 | Asxl3         | 0.000109942 |
| mmu.miR.762     | ILMN_2783457 | 2310044H10Rik | 0.000116808 |
| mmu.miR.669c    | ILMN_1250704 | Rcsd1         | 0.000119022 |
| mmu.miR.1934    | ILMN_1218540 | Ilvbl         | 0.000121799 |
| mmu.miR.875.3p  | ILMN_1241497 | Alpi          | 0.000124208 |
| mmu.miR.667     | ILMN_2427705 | Ak7           | 0.000127216 |
| mmu.miR.20a     | ILMN_1214708 | Rab22a        | 0.000138101 |
| mmu.miR.297a    | ILMN_2750402 | Nudt19        | 0.000139681 |
| mmu.miR.425     | ILMN_2629657 | Csda          | 0.000144185 |
| mmu.miR.200c    | ILMN_2714565 | Rrm2          | 0.000145786 |
| mmu.miR.28      | ILMN_3160881 | Vrk3          | 0.000147837 |
| mmu.miR.320     | ILMN_2596459 | Nipsnap3a     | 0.000151942 |
| mmu.miR.3068    | ILMN_1237995 | Tacr3         | 0.000152887 |
| mmu.miR.107     | ILMN_1215679 | Ppp2r3c       | 0.000159093 |
| mmu.miR.669c    | ILMN_1232081 | Cald1         | 0.000160625 |
| mmu.miR.122     | ILMN_2813724 | Bai2          | 0.00016633  |
| mmu.miR.194     | ILMN_1231805 | Pik3r4        | 0.000172064 |
| mmu.miR.466m.3p | ILMN_1222499 | Slc33a1       | 0.000190766 |
| mmu.miR.125b.5p | ILMN_1223315 | Scarb1        | 0.000194892 |
| mmu.miR.142.5p  | ILMN_1259174 | Scin          | 0.00019724  |



|                 |              |               |             |
|-----------------|--------------|---------------|-------------|
| mmu.miR.126.5p  | ILMN_1214142 | Hcrtr2        | 0.000202353 |
| mmu.miR.883a.5p | ILMN_2734283 | Slc25a44      | 0.000208761 |
| mmu.miR.706     | ILMN_1220547 | Styx11        | 0.000210119 |
| mmu.miR.1897.5p | ILMN_2594672 | Fads3         | 0.000211496 |
| mmu.miR.668     | ILMN_3070975 | Fbxl12        | 0.000216333 |
| mmu.miR.194     | ILMN_2430804 | Zfp398        | 0.000217176 |
| mmu.miR.669c    | ILMN_2629657 | Csda          | 0.00022145  |
| mmu.miR.329     | ILMN_1217023 | Asxl3         | 0.000234532 |
| mmu.miR.122     | ILMN_1231408 | Ngfr          | 0.000240815 |
| mmu.miR.712     | ILMN_2450786 | Gars          | 0.000243198 |
| mmu.miR.351     | ILMN_1223315 | Scarb1        | 0.00024338  |
| mmu.miR.143     | ILMN_3002181 | Ppif          | 0.000243521 |
| mmu.miR.374     | ILMN_2662456 | Ppm1l         | 0.000243934 |
| mmu.miR.3102    | ILMN_1235783 | Acbd3         | 0.000250621 |
| mmu.miR.29b     | ILMN_2464898 | Amz2          | 0.000251623 |
| mmu.miR.20a     | ILMN_1242007 | Gtf2h2        | 0.000252009 |
| mmu.miR.669n    | ILMN_2672767 | Actn4         | 0.000259753 |
| mmu.miR.1954    | ILMN_2985761 | Gm1322        | 0.00026009  |
| mmu.miR.3096.3p | ILMN_1254558 | Rab23         | 0.000267237 |
| mmu.miR.677     | ILMN_1215722 | Zdhhc13       | 0.000271814 |
| mmu.miR.200a    | ILMN_2429092 | Ybx1          | 0.000272702 |
| mmu.miR.3069.5p | ILMN_1230271 | Anp32a        | 0.000274076 |
| mmu.miR.1192    | ILMN_2589790 | Stat3         | 0.000276682 |
| mmu.miR.374     | ILMN_1228100 | Rgs3          | 0.000280987 |
| mmu.miR.10a     | ILMN_2740134 | ldh3a         | 0.000281392 |
| mmu.miR.186     | ILMN_3158060 | Epn2          | 0.000285413 |
| mmu.miR.1983    | ILMN_2695936 | Fem1a         | 0.000286405 |
| mmu.miR.122     | ILMN_2792362 | Helb          | 0.000293914 |
| mmu.miR.337.3p  | ILMN_2454204 | Tnfrsf22      | 0.000294082 |
| mmu.miR.1a      | ILMN_1244291 | Gja1          | 0.000296591 |
| mmu.miR.30e     | ILMN_2761152 | Ptpn13        | 0.00030804  |
| mmu.miR.3103    | ILMN_2706051 | Ccdc47        | 0.000309721 |
| mmu.miR.762     | ILMN_2481182 | Ucp2          | 0.000318988 |
| mmu.miR.297a    | ILMN_1244064 | Galc          | 0.000336715 |
| mmu.miR.101a    | ILMN_2464898 | Amz2          | 0.000336719 |
| mmu.miR.29c     | ILMN_2708928 | Bdh1          | 0.000342545 |
| mmu.miR.709     | ILMN_2430804 | Zfp398        | 0.000344451 |
| mmu.miR.15a     | ILMN_2885922 | Ptpn3         | 0.000346587 |
| mmu.miR.762     | ILMN_2767825 | 2210011C24Rik | 0.0003545   |
| mmu.miR.207     | ILMN_3129337 | Slc25a34      | 0.000363611 |
| mmu.miR.21      | ILMN_2750062 | Arhgap24      | 0.000376857 |
| mmu.miR.26b     | ILMN_2457959 | Trpc3         | 0.000377588 |
| mmu.miR.329     | ILMN_2937122 | Trak1         | 0.000378889 |
| mmu.miR.3098.3p | ILMN_2511768 | Ttc17         | 0.000382271 |
| mmu.miR.374     | ILMN_1224193 | Wnt5b         | 0.000386607 |
| mmu.miR.429     | ILMN_1237529 | Lce1c         | 0.000392902 |
| mmu.miR.875.3p  | ILMN_2972325 | 2410016O06Rik | 0.000410284 |
| mmu.miR.467h    | ILMN_3163148 | Ddhd1         | 0.000424358 |
| mmu.miR.322     | ILMN_2637897 | Nlr1x1        | 0.000424855 |



|                  |              |               |             |
|------------------|--------------|---------------|-------------|
| mmu.miR.92a      | ILMN_2660650 | Kif5b         | 0.000431998 |
| mmu.miR.29b      | ILMN_2708928 | Bdh1          | 0.00043295  |
| mmu.miR.677      | ILMN_2603647 | Clec2d        | 0.000437148 |
| mmu.miR.145      | ILMN_1226962 | 1300010F03Rik | 0.00043955  |
| mmu.miR.5097     | ILMN_2724570 | Mapk12        | 0.00044346  |
| mmu.miR.326      | ILMN_3096144 | Stat3         | 0.000448289 |
| mmu.miR.762      | ILMN_2438555 | 0610011F06Rik | 0.000455239 |
| mmu.miR.335.3p   | ILMN_1214142 | Hcrtr2        | 0.000456108 |
| mmu.miR.126.5p   | ILMN_1225029 | Mboat1        | 0.000456411 |
| mmu.miR.497      | ILMN_2605756 | Klc1          | 0.000467285 |
| mmu.miR.129.1.3p | ILMN_2706051 | Ccdc47        | 0.000474222 |
| mmu.miR.3474     | ILMN_2641793 | Dtx1          | 0.000504051 |
| mmu.miR.1187     | ILMN_2686348 | Pknox2        | 0.000526312 |
| mmu.miR.582.3p   | ILMN_1254558 | Rab23         | 0.000549597 |
| mmu.miR.181a     | ILMN_1223176 | Magohb        | 0.000551903 |
| mmu.miR.877      | ILMN_1219661 | Cog6          | 0.000569449 |
| mmu.miR.337.3p   | ILMN_1253317 | Xpnpep1       | 0.000597735 |
| mmu.miR.30c      | ILMN_2537125 | Dock7         | 0.000601103 |
| mmu.miR.181a     | ILMN_1217023 | Asxl3         | 0.000605075 |
| mmu.miR.1958     | ILMN_2935789 | Rer1          | 0.000607974 |
| mmu.miR.106b     | ILMN_2714565 | Rrm2          | 0.000610588 |
| mmu.miR.881      | ILMN_2653207 | Tead2         | 0.000614592 |
| mmu.miR.669e     | ILMN_2692733 | Tmem117       | 0.000623514 |
| mmu.miR.337.3p   | ILMN_2428963 | Xpnpep1       | 0.000628144 |
| mmu.miR.195      | ILMN_2770819 | Rnf10         | 0.00064824  |
| mmu.miR.713      | ILMN_1253680 | Prpf4         | 0.000648261 |
| mmu.miR.329      | ILMN_2689230 | Slc6a15       | 0.000651065 |
| mmu.miR.150      | ILMN_2524276 | 6430704M03Rik | 0.00065718  |
| mmu.miR.770.3p   | ILMN_2760095 | 4930438A08Rik | 0.000663661 |
| mmu.miR.221      | ILMN_3009184 | Ap3b2         | 0.000675982 |
| mmu.miR.706      | ILMN_1252690 | Galc          | 0.000694274 |
| mmu.miR.145      | ILMN_1250241 | Csmd3         | 0.000705609 |
| mmu.miR.142.3p   | ILMN_2950721 | 2810008M24Rik | 0.000708785 |
| mmu.miR.342.3p   | ILMN_1217813 | Adh5          | 0.000709263 |
| mmu.miR.290.5p   | ILMN_1260001 | 9630033F20Rik | 0.000724107 |
| mmu.miR.130a     | ILMN_2992232 | Mlxipl        | 0.000734093 |
| mmu.miR.142.3p   | ILMN_2660650 | Kif5b         | 0.000746057 |
| mmu.miR.30e      | ILMN_1221901 | Dock7         | 0.000760861 |
| mmu.miR.762      | ILMN_2668189 | Vps8          | 0.000774833 |
| mmu.miR.186      | ILMN_1245103 | G6pc          | 0.000779846 |
| mmu.miR.27a      | ILMN_3104328 | Brsk1         | 0.000786753 |
| mmu.miR.762      | ILMN_2662456 | Ppm1l         | 0.000813535 |
| mmu.miR.1903     | ILMN_1222226 | Vav3          | 0.000816058 |
| mmu.miR.875.3p   | ILMN_2430804 | Zfp398        | 0.000819528 |
| mmu.miR.544.5p   | ILMN_2601376 | Nlrp4f        | 0.000842366 |
| mmu.miR.20b      | ILMN_1214708 | Rab22a        | 0.000850631 |
| mmu.miR.691      | ILMN_1222226 | Vav3          | 0.000853276 |
| mmu.miR.1264.3p  | ILMN_2910295 | Crim1         | 0.000872523 |
| mmu.miR.15a      | ILMN_2784382 | Lhx3          | 0.000883164 |

|                 |              |               |             |
|-----------------|--------------|---------------|-------------|
| mmu.miR.669n    | ILMN_2698880 | Slc35f3       | 0.000909895 |
| mmu.miR.181a    | ILMN_2705268 | Atp5l         | 0.000909961 |
| mmu.miR.883a.5p | ILMN_1214142 | Hcrtr2        | 0.000910411 |
| mmu.miR.3077    | ILMN_1237642 | Ambra1        | 0.000939359 |
| mmu.miR.1897.5p | ILMN_2606777 | Nfrkb         | 0.000942389 |
| mmu.miR.466i.5p | ILMN_2736690 | 2210411K11Rik | 0.000942975 |
| mmu.miR.29a     | ILMN_1251296 | Elf2          | 0.000961932 |
| mmu.miR.5097    | ILMN_1242007 | Gtf2h2        | 0.000962582 |
| mmu.miR.3084    | ILMN_1237974 | Kcng3         | 0.000983554 |
| mmu.miR.139.5p  | ILMN_2668706 | Slc39a11      | 0.000997827 |
| mmu.miR.186     | ILMN_2940195 | Mgst1         | 0.001009803 |
| mmu.miR.20b     | ILMN_3163148 | Ddhd1         | 0.001025958 |
| mmu.miR.322     | ILMN_1236336 | Rbm6          | 0.001034503 |
| mmu.miR.335.3p  | ILMN_1217023 | Asxl3         | 0.001054257 |
| mmu.miR.762     | ILMN_2937122 | Trak1         | 0.001060668 |
| mmu.miR.29c     | ILMN_1240804 | Asxl3         | 0.00108256  |
| mmu.miR.669i    | ILMN_1228499 | Rnf14         | 0.001101523 |
| mmu.miR.1186    | ILMN_1215738 | Dnaja3        | 0.001104939 |
| mmu.miR.214     | ILMN_1215149 | Crtc1         | 0.001125668 |
| mmu.miR.196b    | ILMN_2464536 | Gpr62         | 0.00112598  |
| mmu.miR.93      | ILMN_1214708 | Rab22a        | 0.001136329 |
| mmu.miR.195     | ILMN_1236336 | Rbm6          | 0.001137199 |
| mmu.miR.3474    | ILMN_1255823 | Higd2a        | 0.001144934 |
| mmu.miR.3084    | ILMN_2496796 | Flnb          | 0.00115052  |
| mmu.miR.106b    | ILMN_3163148 | Ddhd1         | 0.001162982 |
| mmu.miR.677     | ILMN_1244112 | Dhodh         | 0.001166857 |
| mmu.miR.15b     | ILMN_1236150 | Ap3b1         | 0.001172728 |
| mmu.miR.200a    | ILMN_2653207 | Tead2         | 0.001186564 |
| mmu.miR.106b    | ILMN_2452255 | Irf2bp2       | 0.001198097 |
| mmu.miR.1264.3p | ILMN_2896768 | Cbr3          | 0.001226654 |
| mmu.miR.466f    | ILMN_2591156 | Il27ra        | 0.001234156 |
| mmu.miR.883a.5p | ILMN_3019158 | Ms4a7         | 0.001240633 |
| mmu.miR.214     | ILMN_2610679 | Rgs3          | 0.001257328 |
| mmu.miR.106b    | ILMN_1252745 | Gtf2h2        | 0.001272675 |
| mmu.miR.93      | ILMN_2834837 | Fmn13         | 0.00127387  |
| mmu.miR.30c     | ILMN_3002943 | Tmed10        | 0.001284311 |
| mmu.miR.664     | ILMN_2455192 | Zfp68         | 0.001292567 |
| mmu.miR.337.3p  | ILMN_2968807 | Rpain         | 0.001292953 |
| mmu.miR.466f.3p | ILMN_2504433 | Hsp90b1       | 0.00129425  |
| mmu.miR.1192    | ILMN_1240730 | Ttc12         | 0.001298812 |
| mmu.miR.145     | ILMN_2772117 | Itln1         | 0.001323732 |
| mmu.miR.222     | ILMN_1250064 | 6430550D23Rik | 0.001338511 |
| mmu.miR.883b.5p | ILMN_1241869 | Map3k14       | 0.001363165 |
| mmu.miR.106b    | ILMN_2664219 | Hmbox1        | 0.001366883 |
| mmu.miR.3474    | ILMN_1220047 | Adamts14      | 0.001377198 |
| mmu.miR.374     | ILMN_2452255 | Irf2bp2       | 0.001379153 |
| mmu.miR.425     | ILMN_1227993 | Vav3          | 0.001384333 |
| mmu.miR.5097    | ILMN_1217023 | Asxl3         | 0.001387379 |
| mmu.miR.5097    | ILMN_3160881 | Vrk3          | 0.001388315 |

|                 |              |               |             |
|-----------------|--------------|---------------|-------------|
| mmu.miR.21      | ILMN_2745305 | Glis2         | 0.001391833 |
| mmu.miR.877     | ILMN_2758878 | Tmem66        | 0.001413304 |
| mmu.miR.875.3p  | ILMN_1219518 | Thrap3        | 0.001420612 |
| mmu.miR.1934    | ILMN_1240256 | Slc9a3r1      | 0.001482366 |
| mmu.miR.3069.5p | ILMN_1237967 | Nol3          | 0.001485211 |
| mmu.miR.20a     | ILMN_2664219 | Hmbox1        | 0.001507781 |
| mmu.miR.466i.5p | ILMN_2445477 | Wars          | 0.00152228  |
| mmu.miR.20a     | ILMN_2826027 | Ube2q2        | 0.001563248 |
| mmu.miR.340.5p  | ILMN_2708928 | Bdh1          | 0.001573202 |
| mmu.miR.325     | ILMN_2599751 | Rabep2        | 0.001583206 |
| mmu.miR.17      | ILMN_1221587 | Ppp1r3e       | 0.001584474 |
| mmu.miR.466a.5p | ILMN_2610679 | Rgs3          | 0.001597414 |
| mmu.miR.691     | ILMN_2607253 | Rpsa          | 0.001651371 |
| mmu.miR.1192    | ILMN_2452255 | Irf2bp2       | 0.001660343 |
| mmu.miR.429     | ILMN_2619136 | Pthlh         | 0.001672313 |
| mmu.miR.106a    | ILMN_1249578 | Sorl1         | 0.001675215 |
| mmu.miR.205     | ILMN_2852979 | Adh5          | 0.001683561 |
| mmu.miR.1958    | ILMN_3163148 | Ddhd1         | 0.001685888 |
| mmu.miR.335.3p  | ILMN_2906414 | Tmed4         | 0.00171348  |
| mmu.miR.200a    | ILMN_1260219 | Adipor2       | 0.00171997  |
| mmu.miR.505.5p  | ILMN_2840492 | Acot2         | 0.001786512 |
| mmu.miR.302a    | ILMN_1245258 | Slc6a15       | 0.001788923 |
| mmu.miR.1192    | ILMN_2862362 | Neurod2       | 0.001809507 |
| mmu.miR.712     | ILMN_2661005 | 1110018G07Rik | 0.001813162 |
| mmu.miR.194     | ILMN_2810882 | Ppic          | 0.00185331  |
| mmu.miR.20a     | ILMN_2769191 | Tbxas1        | 0.001859361 |
| mmu.miR.342.3p  | ILMN_2675883 | Hars2         | 0.001869243 |
| mmu.miR.467h    | ILMN_2745925 | Farp2         | 0.001877003 |
| mmu.miR.296.3p  | ILMN_2959974 | Cdan1         | 0.001907374 |
| mmu.miR.200b    | ILMN_1257394 | Rundc1        | 0.001919476 |
| mmu.miR.144     | ILMN_2689265 | Ccr11         | 0.001920367 |
| mmu.miR.22      | ILMN_2723763 | Chga          | 0.00193872  |
| mmu.miR.465b.5p | ILMN_2602169 | Kera          | 0.001940806 |
| mmu.miR.20b     | ILMN_2769191 | Tbxas1        | 0.001956157 |
| mmu.miR.205     | ILMN_1234000 | LOC665290     | 0.00199557  |
| mmu.miR.155     | ILMN_1224128 | Nfe2l2        | 0.001997345 |
| mmu.miR.20a     | ILMN_2647197 | Rasd1         | 0.001999281 |
| mmu.miR.466d.5p | ILMN_2770882 | Foxl1         | 0.002019737 |
| mmu.miR.142.5p  | ILMN_2631097 | Msh6          | 0.002026594 |
| mmu.miR.1892    | ILMN_2962113 | Psg16         | 0.002069454 |
| mmu.miR.148b    | ILMN_2734283 | Slc25a44      | 0.002080858 |
| mmu.miR.712     | ILMN_2723763 | Chga          | 0.002092822 |
| mmu.miR.340.5p  | ILMN_1224792 | Sltm          | 0.002105596 |
| mmu.let.7c      | ILMN_1224697 | Fbxl12        | 0.002116144 |
| mmu.miR.30b     | ILMN_1239921 | Man1b1        | 0.002138639 |
| mmu.miR.15b     | ILMN_2731206 | Ppih          | 0.00215148  |
| mmu.miR.351     | ILMN_1260455 | Lhx3          | 0.002159633 |
| mmu.miR.21      | ILMN_2626318 | Elf2          | 0.002161927 |
| mmu.miR.106a    | ILMN_1241630 | Spinlw1       | 0.002174838 |

|                 |              |               |             |
|-----------------|--------------|---------------|-------------|
| mmu.miR.103     | ILMN_1215679 | Ppp2r3c       | 0.002175177 |
| mmu.miR.668     | ILMN_1249301 | Bckdk         | 0.002181094 |
| mmu.miR.30c     | ILMN_1216110 | Slc35d3       | 0.002300054 |
| mmu.miR.338.5p  | ILMN_2669991 | Tmem135       | 0.002332469 |
| mmu.miR.3096.3p | ILMN_2687881 | Rab23         | 0.002339669 |
| mmu.miR.721     | ILMN_3102467 | Rab34         | 0.002341502 |
| mmu.miR.425     | ILMN_2739989 | 4930534B04Rik | 0.00237199  |
| mmu.miR.145     | ILMN_2499707 | Pop4          | 0.002421007 |
| mmu.let.7a      | ILMN_3070975 | Fbxl12        | 0.00243924  |
| mmu.miR.1958    | ILMN_2677696 | Abcf3         | 0.00249871  |
| mmu.miR.139.5p  | ILMN_2764201 | Rdh13         | 0.002503889 |
| mmu.miR.106b    | ILMN_3150468 | Mink1         | 0.00253894  |
| mmu.miR.126.5p  | ILMN_2473348 | Ttc13         | 0.002550255 |
| mmu.miR.378     | ILMN_1240449 | Isx           | 0.002568451 |
| mmu.miR.142.3p  | ILMN_2486600 | 2810008M24Rik | 0.002580022 |
| mmu.miR.126.5p  | ILMN_1252690 | Galc          | 0.002598489 |
| mmu.miR.223     | ILMN_2761643 | Krtap6-2      | 0.002605781 |
| mmu.miR.881     | ILMN_2524276 | 6430704M03Rik | 0.002651985 |
| mmu.miR.669h.3p | ILMN_2985761 | Gm1322        | 0.002670695 |
| mmu.miR.339.5p  | ILMN_1254037 | Tigd3         | 0.002685954 |
| mmu.miR.3474    | ILMN_1239921 | Man1b1        | 0.002746419 |
| mmu.miR.5097    | ILMN_1225330 | Foxp3         | 0.002806717 |
| mmu.miR.378     | ILMN_2648746 | Bckdk         | 0.002821454 |
| mmu.miR.466f.3p | ILMN_2637156 | Fpgt          | 0.002908842 |
| mmu.miR.664     | ILMN_2735449 | Cfhr1         | 0.002919097 |
| mmu.miR.325     | ILMN_1215580 | Prl7d1        | 0.002931615 |
| mmu.miR.770.3p  | ILMN_2836637 | Glt8d2        | 0.002949988 |
| mmu.miR.3082.5p | ILMN_1238284 | Dkc1          | 0.002950965 |
| mmu.miR.15b     | ILMN_2686393 | Gna12         | 0.00297484  |
| mmu.miR.1892    | ILMN_1251126 | Foxp3         | 0.00301233  |
| mmu.miR.29a     | ILMN_3142193 | Lysmd1        | 0.00301299  |
| mmu.miR.328     | ILMN_2721980 | AW551984      | 0.003019068 |
| mmu.miR.141     | ILMN_1227250 | Specc1l       | 0.003062939 |
| mmu.miR.669e    | ILMN_2499746 | Trim27        | 0.003083484 |
| mmu.miR.709     | ILMN_2627566 | Capn5         | 0.003092793 |
| mmu.miR.762     | ILMN_2474011 | Nxn           | 0.003095883 |
| mmu.miR.125a.5p | ILMN_1233160 | Triap1        | 0.003133626 |
| mmu.miR.351     | ILMN_2588411 | Grina         | 0.00314824  |
| mmu.miR.322     | ILMN_1236150 | Ap3b1         | 0.003245098 |
| mmu.miR.337.3p  | ILMN_2676066 | Stard7        | 0.00329937  |
| mmu.miR.3474    | ILMN_1229161 | Eng           | 0.003302459 |
| mmu.miR.337.3p  | ILMN_2597606 | Gjc2          | 0.003310346 |
| mmu.miR.3084    | ILMN_2687881 | Rab23         | 0.00331436  |
| mmu.miR.762     | ILMN_1227164 | Tubb5         | 0.003367661 |
| mmu.miR.3077    | ILMN_3048294 | Ambra1        | 0.00337282  |
| mmu.miR.335.3p  | ILMN_2804996 | Ttc30b        | 0.003372826 |
| mmu.miR.470     | ILMN_3002943 | Tmed10        | 0.00338566  |
| mmu.miR.185     | ILMN_1220986 | H2-Q5         | 0.003387137 |
| mmu.let.7e      | ILMN_1226152 | Alkbh4        | 0.003388007 |

|                 |              |               |             |
|-----------------|--------------|---------------|-------------|
| mmu.miR.185     | ILMN_3002943 | Tmed10        | 0.003412946 |
| mmu.miR.669n    | ILMN_2653900 | 1110038D17Rik | 0.003420953 |
| mmu.miR.338.5p  | ILMN_2607612 | Sp2           | 0.003425189 |
| mmu.miR.3098.3p | ILMN_1215149 | Crtc1         | 0.003449062 |
| mmu.miR.497     | ILMN_3150468 | Mink1         | 0.003531522 |
| mmu.miR.374     | ILMN_1239208 | Rgs3          | 0.003548999 |
| mmu.miR.20b     | ILMN_2520600 | Iqsec1        | 0.003590157 |
| mmu.miR.503     | ILMN_2688415 | 1300010F03Rik | 0.003604722 |
| mmu.miR.2183    | ILMN_1240256 | Slc9a3r1      | 0.003629844 |
| mmu.miR.34a     | ILMN_2908547 | Arfgap1       | 0.003722783 |
| mmu.miR.3100.3p | ILMN_3163148 | Ddhd1         | 0.003737768 |
| mmu.miR.883b.5p | ILMN_2708928 | Bdh1          | 0.003742942 |
| mmu.miR.126.5p  | ILMN_1244064 | Galc          | 0.003757175 |
| mmu.miR.466n.5p | ILMN_2940195 | Mgst1         | 0.0037976   |
| mmu.miR.374     | ILMN_2935789 | Rer1          | 0.003806969 |
| mmu.miR.3474    | ILMN_2695936 | Fem1a         | 0.003835904 |
| mmu.miR.196b    | ILMN_2628175 | Tsen34        | 0.003838371 |
| mmu.miR.141     | ILMN_2429092 | Ybx1          | 0.003860167 |
| mmu.let.7f      | ILMN_2973115 | Ngly1         | 0.003862895 |
| mmu.miR.669c    | ILMN_2705078 | Csda          | 0.00387138  |
| mmu.miR.16      | ILMN_2789888 | Rnf10         | 0.003916458 |
| mmu.miR.712     | ILMN_2647427 | 4632415K11Rik | 0.003948687 |
| mmu.miR.664     | ILMN_2429092 | Ybx1          | 0.003980056 |
| mmu.miR.27a     | ILMN_2990014 | Dnase2b       | 0.004049965 |
| mmu.miR.1903    | ILMN_3160517 | Cox17         | 0.004060036 |
| mmu.miR.374     | ILMN_3123889 | Zfp277        | 0.004106711 |
| mmu.miR.1192    | ILMN_1216110 | Slc35d3       | 0.004121894 |
| mmu.miR.503     | ILMN_1250588 | Ptk7          | 0.00415073  |
| mmu.miR.465b.5p | ILMN_2458274 | Ubap1         | 0.004160322 |
| mmu.miR.882     | ILMN_2944755 | Klrg1         | 0.004181486 |
| mmu.miR.186     | ILMN_2804973 | Zfp639        | 0.004198898 |
| mmu.miR.466n.3p | ILMN_1232081 | Cald1         | 0.004281382 |
| mmu.miR.466f.5p | ILMN_2712976 | Slc18a1       | 0.004314453 |
| mmu.miR.503     | ILMN_2646511 | 1300010F03Rik | 0.00434857  |
| mmu.miR.126.5p  | ILMN_1224507 | Gcm2          | 0.004385695 |
| mmu.miR.325     | ILMN_2645719 | Tmem199       | 0.00443434  |
| mmu.let.7f      | ILMN_3149680 | Fbxl12        | 0.004438333 |
| mmu.miR.148b    | ILMN_2706051 | Ccdc47        | 0.004463664 |
| mmu.miR.329     | ILMN_1254558 | Rab23         | 0.004479781 |
| mmu.miR.466d.5p | ILMN_2736690 | 2210411K11Rik | 0.00448766  |
| mmu.miR.3096.3p | ILMN_3162342 | Olfr872       | 0.004488854 |
| mmu.miR.1839.3p | ILMN_2620484 | Pkp4          | 0.004511342 |
| mmu.miR.144     | ILMN_2751037 | Spata13       | 0.004527174 |
| mmu.miR.875.3p  | ILMN_2687372 | Hectd3        | 0.004557543 |
| mmu.miR.186     | ILMN_2659617 | Epn2          | 0.004586148 |
| mmu.miR.155     | ILMN_2739825 | Dync1i1       | 0.00463489  |
| mmu.miR.15b     | ILMN_2636143 | lnk           | 0.004651326 |
| mmu.miR.1941.3p | ILMN_2499747 | Trim27        | 0.004663076 |
| mmu.miR.1903    | ILMN_1227993 | Vav3          | 0.004690817 |

|                 |              |               |             |
|-----------------|--------------|---------------|-------------|
| mmu.miR.1958    | ILMN_2734693 | Ildr1         | 0.004715512 |
| mmu.miR.3473    | ILMN_1240730 | Ttc12         | 0.004730594 |
| mmu.miR.762     | ILMN_1249922 | Ppp1r3e       | 0.004739025 |
| mmu.let.7c      | ILMN_3149680 | Fbxl12        | 0.004786294 |
| mmu.miR.1897.5p | ILMN_2940440 | Ganab         | 0.004788932 |
| mmu.miR.693.5p  | ILMN_1255644 | Atn1          | 0.00481854  |
| mmu.miR.712     | ILMN_2600339 | Gosr2         | 0.004825478 |
| mmu.miR.713     | ILMN_1250241 | Csmd3         | 0.0048534   |
| mmu.miR.185     | ILMN_1225734 | Nol6          | 0.004854202 |
| mmu.miR.149     | ILMN_1237917 | Sparcl1       | 0.004896237 |
| mmu.miR.23b     | ILMN_1227561 | Plcg1         | 0.004933103 |
| mmu.miR.200b    | ILMN_2760161 | Ntf3          | 0.004948406 |
| mmu.miR.320     | ILMN_3163148 | Ddhd1         | 0.004951488 |
| mmu.miR.883a.5p | ILMN_2603958 | Gramd3        | 0.004969129 |
| mmu.miR.290.3p  | ILMN_1256444 | Osr1          | 0.004998286 |
| mmu.miR.15b     | ILMN_2669991 | Tmem135       | 0.005018268 |
| mmu.miR.1958    | ILMN_2662962 | Rhot2         | 0.005025553 |
| mmu.miR.466i.5p | ILMN_2894355 | Prox1         | 0.005031462 |
| mmu.miR.2861    | ILMN_2754453 | Foxj1         | 0.005056141 |
| mmu.miR.484     | ILMN_2855423 | Ube3b         | 0.00508556  |
| mmu.miR.1957    | ILMN_2733843 | Dmrt1         | 0.005092292 |
| mmu.miR.351     | ILMN_2461345 | Zfp41         | 0.005121155 |
| mmu.miR.875.3p  | ILMN_1215832 | Csmd3         | 0.005158098 |
| mmu.miR.762     | ILMN_2494455 | Zfp219        | 0.005224521 |
| mmu.miR.1892    | ILMN_2672289 | Ptpn3         | 0.005237513 |
| mmu.let.7b      | ILMN_1214843 | Mettl6        | 0.005238123 |
| mmu.miR.20a     | ILMN_1259672 | Pdzd7         | 0.005271317 |
| mmu.miR.1934    | ILMN_2709279 | Tmem180       | 0.005303131 |
| mmu.let.7c      | ILMN_1236008 | Isoc2a        | 0.005338571 |
| mmu.miR.223     | ILMN_2486600 | 2810008M24Rik | 0.005367752 |
| mmu.miR.326     | ILMN_3049465 | D830030K20Rik | 0.005448727 |
| mmu.miR.181a    | ILMN_2803368 | Zfp180        | 0.005476274 |
| mmu.miR.3084    | ILMN_2803368 | Zfp180        | 0.00548366  |
| mmu.miR.3084    | ILMN_1252267 | 4933424B01Rik | 0.005520039 |
| mmu.miR.1897.5p | ILMN_2516312 | Pja1          | 0.0055653   |
| mmu.miR.762     | ILMN_2619107 | Lgals1        | 0.005625479 |
| mmu.miR.291a.5p | ILMN_1239801 | Irf2bp2       | 0.005678072 |
| mmu.miR.181a    | ILMN_1237995 | Tacr3         | 0.0057151   |
| mmu.miR.23a     | ILMN_1217023 | Asxl3         | 0.00572825  |
| mmu.miR.468     | ILMN_2661005 | 1110018G07Rik | 0.005754424 |
| mmu.miR.466f.3p | ILMN_1258270 | Lamc3         | 0.005779226 |
| mmu.miR.875.3p  | ILMN_1232317 | Sstr5         | 0.005780089 |
| mmu.miR.325     | ILMN_1226293 | Slc39a4       | 0.005837611 |
| mmu.miR.665     | ILMN_2626606 | Lrrc14        | 0.005838425 |
| mmu.miR.107     | ILMN_2732801 | Rtnn          | 0.005844779 |
| mmu.miR.141     | ILMN_2674643 | Tdo2          | 0.005873523 |
| mmu.miR.93      | ILMN_1249922 | Ppp1r3e       | 0.005898935 |
| mmu.miR.139.5p  | ILMN_3002943 | Tmed10        | 0.005902728 |
| mmu.miR.883b.5p | ILMN_2664219 | Hmbox1        | 0.006116592 |



|                 |              |               |             |
|-----------------|--------------|---------------|-------------|
| mmu.miR.423.5p  | ILMN_1251995 | Ttll4         | 0.006124124 |
| mmu.miR.669n    | ILMN_2533766 | Ccdc109a      | 0.006136235 |
| mmu.miR.574.5p  | ILMN_1238143 | Ucn3          | 0.006148884 |
| mmu.miR.329     | ILMN_1240804 | Asxl3         | 0.006153179 |
| mmu.miR.1903    | ILMN_2649174 | Ints10        | 0.006187305 |
| mmu.miR.877     | ILMN_2759722 | Ebf4          | 0.006200576 |
| mmu.miR.3100.3p | ILMN_2771326 | Atxn10        | 0.006209302 |
| mmu.miR.720     | ILMN_2664219 | Hmbox1        | 0.006258444 |
| mmu.miR.15a     | ILMN_2610861 | Ap3b1         | 0.006292396 |
| mmu.miR.15b     | ILMN_2637897 | Nlrx1         | 0.006365551 |
| mmu.miR.149     | ILMN_2811240 | Tprkb         | 0.006380994 |
| mmu.miR.181a    | ILMN_2937122 | Trak1         | 0.006389219 |
| mmu.miR.150     | ILMN_2661005 | 1110018G07Rik | 0.006416897 |
| mmu.miR.693.5p  | ILMN_1242790 | Fsd2          | 0.006428327 |
| mmu.miR.706     | ILMN_2572446 | Pik3c2g       | 0.006528138 |
| mmu.miR.484     | ILMN_1219072 | Flt4          | 0.00654488  |
| mmu.miR.20a     | ILMN_2910295 | Crim1         | 0.006609183 |
| mmu.miR.669e    | ILMN_1259672 | Pdzd7         | 0.006623088 |
| mmu.miR.27a     | ILMN_2641360 | Ak2           | 0.006623162 |
| mmu.miR.297a    | ILMN_2643648 | Dbc1          | 0.00663814  |
| mmu.miR.142.5p  | ILMN_2701617 | Gdnf          | 0.006687116 |
| mmu.miR.126.5p  | ILMN_2662456 | Ppm1l         | 0.006734703 |
| mmu.miR.1264.3p | ILMN_2639777 | Sphk2         | 0.006803547 |
| mmu.miR.340.5p  | ILMN_1224022 | E130308A19Rik | 0.006856402 |
| mmu.miR.122     | ILMN_2511412 | A330050F15Rik | 0.006895086 |
| mmu.miR.139.5p  | ILMN_1234759 | Nudt21        | 0.006952499 |
| mmu.miR.1186    | ILMN_2634749 | Txn14a        | 0.006971444 |
| mmu.miR.500     | ILMN_2675883 | Hars2         | 0.00700056  |
| mmu.miR.93      | ILMN_1222333 | Slc2a4        | 0.007015225 |
| mmu.miR.669i    | ILMN_2718421 | Acot5         | 0.007024494 |
| mmu.miR.329     | ILMN_2557166 | Rab23         | 0.007068003 |
| mmu.miR.466i.5p | ILMN_3156343 | Wars          | 0.00709005  |
| mmu.miR.150     | ILMN_1214369 | Nfe2l2        | 0.007224083 |
| mmu.miR.195     | ILMN_2789888 | Rnf10         | 0.007300867 |
| mmu.miR.351     | ILMN_2680876 | lqce          | 0.007334232 |
| mmu.miR.3100.3p | ILMN_1220336 | Tmc1          | 0.007497915 |
| mmu.miR.1192    | ILMN_2684910 | Sirt6         | 0.007596657 |
| mmu.miR.15b     | ILMN_2514292 | Zyx           | 0.007620281 |
| mmu.let.7d      | ILMN_1224697 | Fbxl12        | 0.007692889 |
| mmu.miR.107     | ILMN_1253365 | Lypd1         | 0.007796119 |
| mmu.miR.365     | ILMN_2653633 | Csmd3         | 0.007827596 |
| mmu.miR.374     | ILMN_1244180 | Irf2bp2       | 0.007913763 |
| mmu.miR.713     | ILMN_2653633 | Csmd3         | 0.00792857  |
| mmu.miR.195     | ILMN_2686393 | Gna12         | 0.007932679 |
| mmu.miR.155     | ILMN_3009400 | Raver2        | 0.007941374 |
| mmu.miR.125b.5p | ILMN_2660837 | St6galnac4    | 0.007967207 |
| mmu.miR.5097    | ILMN_1214142 | Hcrr2         | 0.008002459 |
| mmu.miR.339.5p  | ILMN_2997763 | Hsd17b1       | 0.008076952 |
| mmu.miR.106a    | ILMN_2619136 | Pthlh         | 0.008083817 |



|                 |              |               |             |
|-----------------|--------------|---------------|-------------|
| mmu.miR.98      | ILMN_3149680 | Fbxl12        | 0.008103749 |
| mmu.miR.3069.5p | ILMN_2599130 | Aldoa         | 0.008105117 |
| mmu.miR.1934    | ILMN_2680618 | Crtc1         | 0.008112258 |
| mmu.miR.770.3p  | ILMN_2600389 | Slc7a6        | 0.00812845  |
| mmu.miR.325     | ILMN_2937122 | Trak1         | 0.008170672 |
| mmu.miR.691     | ILMN_2851575 | Tnfsf14       | 0.008226294 |
| mmu.miR.1958    | ILMN_1224846 | Cdkl3         | 0.008244511 |
| mmu.miR.762     | ILMN_2855123 | Ucp2          | 0.00827553  |
| mmu.miR.710     | ILMN_1242359 | Mtap7d3       | 0.008284985 |
| mmu.miR.20b     | ILMN_2601974 | Sema7a        | 0.008344835 |
| mmu.miR.1264.3p | ILMN_2608811 | Cbr3          | 0.008350274 |
| mmu.miR.142.5p  | ILMN_2665591 | 1700010114Rik | 0.008360742 |
| mmu.miR.467f    | ILMN_2640961 | Acyp1         | 0.008476452 |
| mmu.miR.329     | ILMN_2511412 | A330050F15Rik | 0.008658283 |
| mmu.miR.1186    | ILMN_2635132 | Foxp3         | 0.008745264 |
| mmu.miR.1192    | ILMN_1250588 | Ptk7          | 0.008822781 |
| mmu.miR.3084    | ILMN_2606502 | Tapbpl        | 0.008879797 |
| mmu.miR.107     | ILMN_1236150 | Ap3b1         | 0.008902121 |
| mmu.miR.1892    | ILMN_2946466 | Bin1          | 0.009004009 |
| mmu.miR.1894.3p | ILMN_2685275 | Tmem109       | 0.009012112 |
| mmu.miR.200c    | ILMN_3160634 | Gm410         | 0.009106572 |
| mmu.miR.34b.5p  | ILMN_2692207 | Cbx2          | 0.009117302 |
| mmu.miR.709     | ILMN_1257163 | Tnks1bp1      | 0.009119587 |
| mmu.miR.149     | ILMN_2706232 | Syngn2        | 0.009141127 |
| mmu.miR.720     | ILMN_1235909 | Ak2           | 0.009143369 |
| mmu.miR.3068    | ILMN_2655595 | Crcp          | 0.00919844  |
| mmu.miR.30d     | ILMN_2767216 | Actc1         | 0.009230865 |
| mmu.miR.10a     | ILMN_1227815 | ldh3a         | 0.00923553  |
| mmu.miR.3474    | ILMN_2701617 | Gdnf          | 0.009300323 |
| mmu.miR.340.5p  | ILMN_1214369 | Nfe2l2        | 0.009301324 |
| mmu.miR.335.3p  | ILMN_2852764 | LOC380994     | 0.009333197 |
| mmu.miR.22      | ILMN_2621160 | Ddb2          | 0.0093458   |
| mmu.miR.709     | ILMN_1237306 | Ddx54         | 0.009380647 |
| mmu.miR.762     | ILMN_2978533 | Trabd         | 0.009433745 |
| mmu.miR.324.3p  | ILMN_2703392 | LOC100047937  | 0.009616121 |
| mmu.miR.15b     | ILMN_1244836 | Tmem41a       | 0.009621115 |
| mmu.miR.3095.3p | ILMN_2458274 | Ubap1         | 0.009647887 |
| mmu.miR.721     | ILMN_2617441 | Stk11ip       | 0.009659898 |
| mmu.miR.186     | ILMN_2472444 | Traf4         | 0.009681782 |
| mmu.miR.665     | ILMN_3041056 | Med22         | 0.009743924 |
| mmu.miR.122     | ILMN_3052781 | Slc25a34      | 0.009859787 |
| mmu.miR.325     | ILMN_2735118 | Pprc1         | 0.009869601 |
| mmu.miR.505.5p  | ILMN_1226316 | Glis2         | 0.009891722 |
| mmu.miR.181a    | ILMN_2754453 | Foxj1         | 0.009928299 |
| mmu.miR.470     | ILMN_1212804 | Pou3f3        | 0.009970178 |
| mmu.miR.669i    | ILMN_2706051 | Ccdc47        | 0.009970785 |
| mmu.miR.200c    | ILMN_2729422 | Ror2          | 0.009999622 |
| mmu.miR.882     | ILMN_2427705 | Ak7           | 0.010060706 |
| mmu.miR.669n    | ILMN_1225035 | Carhsp1       | 0.010076708 |

|                 |              |               |             |
|-----------------|--------------|---------------|-------------|
| mmu.miR.338.3p  | ILMN_1256514 | Dus3l         | 0.010104174 |
| mmu.miR.27b     | ILMN_2641360 | Ak2           | 0.010194316 |
| mmu.miR.200b    | ILMN_2714565 | Rrm2          | 0.010327824 |
| mmu.miR.669c    | ILMN_2694659 | Ckap5         | 0.010350064 |
| mmu.miR.326     | ILMN_2499400 | Vamp8         | 0.010388309 |
| mmu.miR.466c.5p | ILMN_2491301 | Usp16         | 0.010428001 |
| mmu.miR.335.3p  | ILMN_1259769 | Pabpc1        | 0.010439929 |
| mmu.miR.200c    | ILMN_2877541 | Crtap         | 0.010488995 |
| mmu.miR.214     | ILMN_2626389 | Nomo1         | 0.010590247 |
| mmu.miR.1186b   | ILMN_1254444 | Dus4l         | 0.010656331 |
| mmu.miR.713     | ILMN_2713491 | Hist1h1e      | 0.010709441 |
| mmu.miR.466i.5p | ILMN_3010109 | Slc25a11      | 0.010737705 |
| mmu.miR.770.3p  | ILMN_1225201 | Rpl21         | 0.010738052 |
| mmu.miR.710     | ILMN_2817864 | Ckmt2         | 0.010746519 |
| mmu.miR.1897.5p | ILMN_2647427 | 4632415K11Rik | 0.010748992 |
| mmu.miR.351     | ILMN_1236482 | Lhx3          | 0.010795934 |
| mmu.miR.1934    | ILMN_1256292 | Ilvbl         | 0.010870314 |
| mmu.miR.342.3p  | ILMN_2910768 | Pilra         | 0.010931371 |
| mmu.let.7b      | ILMN_3128363 | Slc14a2       | 0.010936003 |
| mmu.miR.342.3p  | ILMN_1216723 | Btn2a2        | 0.010967895 |
| mmu.miR.762     | ILMN_1257511 | Phkg2         | 0.011001218 |
| mmu.miR.186     | ILMN_2591414 | Tax1bp1       | 0.011029782 |
| mmu.miR.340.5p  | ILMN_1231553 | Bdh1          | 0.01104526  |
| mmu.miR.130a    | ILMN_2713160 | Rtcd1         | 0.01111413  |
| mmu.miR.883b.5p | ILMN_1250704 | Rcsd1         | 0.011173413 |
| mmu.miR.200a    | ILMN_3058640 | Als2cr4       | 0.011206761 |
| mmu.miR.30b     | ILMN_3057208 | Slc35c1       | 0.011225557 |
| mmu.miR.883a.5p | ILMN_1218036 | Sco1          | 0.011308254 |
| mmu.miR.669n    | ILMN_2599514 | Ankmy2        | 0.011348091 |
| mmu.miR.142.5p  | ILMN_1224045 | Dsp           | 0.01137698  |
| mmu.miR.205     | ILMN_2991339 | Zfp646        | 0.011493046 |
| mmu.miR.139.5p  | ILMN_2616638 | D1Bwg0212e    | 0.011501811 |
| mmu.miR.677     | ILMN_2648661 | Cap1          | 0.011565434 |
| mmu.miR.181b    | ILMN_1228567 | Pknox2        | 0.011575173 |
| mmu.miR.342.3p  | ILMN_2754787 | Rsrc1         | 0.01173246  |
| mmu.miR.106b    | ILMN_2768905 | Mink1         | 0.011875808 |
| mmu.miR.470     | ILMN_2620122 | P2rx4         | 0.011898674 |
| mmu.miR.1958    | ILMN_2687881 | Rab23         | 0.011905222 |
| mmu.miR.291a.5p | ILMN_1252400 | Stambpl1      | 0.011977947 |
| mmu.miR.29c     | ILMN_2700797 | Ppic          | 0.012021993 |
| mmu.miR.762     | ILMN_2691878 | Cdkal1        | 0.012029401 |
| mmu.miR.23b     | ILMN_1214142 | Hcrtr2        | 0.012094979 |
| mmu.miR.1934    | ILMN_2753932 | Rnf183        | 0.012119985 |
| mmu.miR.532.3p  | ILMN_1216092 | 9530003J23Rik | 0.012210103 |
| mmu.miR.3069.5p | ILMN_2658953 | Nol3          | 0.012245433 |
| mmu.miR.744     | ILMN_2728796 | C1rl          | 0.01227627  |
| mmu.miR.93      | ILMN_2769191 | Tbxas1        | 0.012333282 |
| mmu.miR.712     | ILMN_1243177 | Atp2b3        | 0.01233691  |
| mmu.miR.3474    | ILMN_2867076 | H2-Oa         | 0.012388606 |

|                 |              |               |             |
|-----------------|--------------|---------------|-------------|
| mmu.miR.1186b   | ILMN_1245258 | Slc6a15       | 0.012398048 |
| mmu.miR.224     | ILMN_2632241 | Fbxo17        | 0.012430281 |
| mmu.miR.770.3p  | ILMN_2855123 | Ucp2          | 0.012434657 |
| mmu.miR.141     | ILMN_2696721 | Gpc2          | 0.012603028 |
| mmu.miR.149     | ILMN_2749604 | Scfd1         | 0.012652897 |
| mmu.miR.27a     | ILMN_2444217 | Myot          | 0.012694913 |
| mmu.miR.762     | ILMN_2643455 | Trabd         | 0.012773074 |
| mmu.miR.466f.3p | ILMN_2930933 | Zfml          | 0.012798729 |
| mmu.miR.221     | ILMN_2662776 | Mpdz          | 0.012813493 |
| mmu.miR.326     | ILMN_2910295 | Crim1         | 0.012849371 |
| mmu.miR.665     | ILMN_3100456 | Med22         | 0.012867417 |
| mmu.miR.1958    | ILMN_2637845 | Dhdds         | 0.012892089 |
| mmu.miR.342.3p  | ILMN_2647197 | Rasd1         | 0.012940165 |
| mmu.miR.26b     | ILMN_2655250 | Txndc15       | 0.012956892 |
| mmu.miR.669n    | ILMN_1230959 | Zfp69         | 0.012998911 |
| mmu.miR.669d    | ILMN_2434327 | Ugt2a1        | 0.013044121 |
| mmu.miR.186     | ILMN_2754054 | 9130401M01Rik | 0.013087079 |
| mmu.miR.15b     | ILMN_1242688 | Mink1         | 0.013309383 |
| mmu.miR.677     | ILMN_1223315 | Scarb1        | 0.013358457 |
| mmu.miR.20b     | ILMN_3150468 | Mink1         | 0.01339279  |
| mmu.miR.466f.3p | ILMN_1237003 | Slu7          | 0.013477018 |
| mmu.miR.20a     | ILMN_2619136 | Pthlh         | 0.013487377 |
| mmu.miR.875.3p  | ILMN_1219011 | 3110040M04Rik | 0.01358832  |
| mmu.miR.466m.3p | ILMN_2974945 | Cog6          | 0.013608312 |
| mmu.miR.378     | ILMN_1249301 | Bckdk         | 0.013616499 |
| mmu.miR.326     | ILMN_1222902 | Cdan1         | 0.013763373 |
| mmu.miR.107     | ILMN_2933993 | Rad9          | 0.013771245 |
| mmu.miR.10b     | ILMN_1232783 | Mmp25         | 0.013851761 |
| mmu.miR.3084    | ILMN_1254558 | Rab23         | 0.013946745 |
| mmu.miR.3100.3p | ILMN_2769191 | Tbxas1        | 0.014041501 |
| mmu.miR.30e     | ILMN_2725259 | Il2           | 0.014048477 |
| mmu.miR.669c    | ILMN_3071366 | Rcsd1         | 0.014070985 |
| mmu.miR.3095.3p | ILMN_1242555 | Asxl3         | 0.014106559 |
| mmu.miR.291a.5p | ILMN_2864798 | Zc3hc1        | 0.01417158  |
| mmu.miR.466f    | ILMN_2728796 | C1rl          | 0.01422403  |
| mmu.miR.194     | ILMN_1223516 | E130309F12Rik | 0.014291904 |
| mmu.miR.29a     | ILMN_1231553 | Bdh1          | 0.014566862 |
| mmu.miR.30d     | ILMN_1231884 | Tmem121       | 0.014593139 |
| mmu.miR.20a     | ILMN_1244180 | lrf2bp2       | 0.014695555 |
| mmu.miR.1892    | ILMN_1216717 | lkzf3         | 0.014707375 |
| mmu.miR.194     | ILMN_2700797 | Ppic          | 0.014784209 |
| mmu.miR.5097    | ILMN_1259009 | Baat          | 0.014789665 |
| mmu.miR.25      | ILMN_1213541 | Rfx1          | 0.01496119  |
| mmu.miR.30b     | ILMN_2767216 | Actc1         | 0.01499211  |
| mmu.miR.497     | ILMN_1227815 | ldh3a         | 0.015169911 |
| mmu.miR.467h    | ILMN_1232081 | Cald1         | 0.015180323 |
| mmu.let.7c      | ILMN_1214843 | Mettl6        | 0.015192949 |
| mmu.miR.149     | ILMN_1244874 | Syngn2        | 0.015221204 |
| mmu.miR.1958    | ILMN_2918927 | Dusp3         | 0.015341729 |

|                 |              |               |             |
|-----------------|--------------|---------------|-------------|
| mmu.miR.467e    | ILMN_2745925 | Farp2         | 0.01541874  |
| mmu.miR.691     | ILMN_2923865 | Casp6         | 0.015426906 |
| mmu.miR.677     | ILMN_2602607 | 1810037117Rik | 0.01542977  |
| mmu.miR.466n.3p | ILMN_2646001 | 1110008J03Rik | 0.015453409 |
| mmu.miR.21      | ILMN_2760161 | Ntf3          | 0.015463771 |
| mmu.miR.214     | ILMN_1233075 | Ercc2         | 0.015607042 |
| mmu.miR.103     | ILMN_1236150 | Ap3b1         | 0.015613445 |
| mmu.miR.125a.5p | ILMN_2479273 | Kcnt1         | 0.015689012 |
| mmu.miR.875.3p  | ILMN_1241551 | Nell2         | 0.015750006 |
| mmu.miR.3069.5p | ILMN_2487482 | Zfp90         | 0.015757167 |
| mmu.miR.126.5p  | ILMN_2688694 | Adam34        | 0.015967312 |
| mmu.miR.762     | ILMN_2805339 | Hspb6         | 0.015970305 |
| mmu.miR.3474    | ILMN_2773037 | H2-Oa         | 0.015978735 |
| mmu.miR.101b    | ILMN_2768396 | Kif5b         | 0.01613085  |
| mmu.miR.29a     | ILMN_2708928 | Bdh1          | 0.016135342 |
| mmu.miR.324.3p  | ILMN_2474239 | Sla2          | 0.016166352 |
| mmu.miR.706     | ILMN_2918927 | Dusp3         | 0.016234852 |
| mmu.miR.106a    | ILMN_1259672 | Pdzd7         | 0.01627159  |
| mmu.miR.186     | ILMN_2684693 | Dusp3         | 0.016293341 |
| mmu.miR.466n.5p | ILMN_2669416 | Mgst1         | 0.016345659 |
| mmu.miR.93      | ILMN_2714565 | Rrm2          | 0.016406559 |
| mmu.miR.3069.3p | ILMN_2670344 | Lrrn2         | 0.016501066 |
| mmu.miR.720     | ILMN_2641360 | Ak2           | 0.01651751  |
| mmu.miR.544.5p  | ILMN_2696272 | Tmem185b      | 0.016591932 |
| mmu.miR.23b     | ILMN_1242555 | Asxl3         | 0.016651438 |
| mmu.miR.296.3p  | ILMN_2657376 | Nipsnap3a     | 0.016722513 |
| mmu.miR.669e    | ILMN_2754569 | Ccdc15        | 0.016771084 |
| mmu.miR.195     | ILMN_2784382 | Lhx3          | 0.01682625  |
| mmu.miR.326     | ILMN_1258270 | Lamc3         | 0.016939086 |
| mmu.miR.1894.3p | ILMN_2595704 | Adprh         | 0.01697861  |
| mmu.miR.10b     | ILMN_1233927 | Spib          | 0.017065346 |
| mmu.miR.106b    | ILMN_1249578 | Sorl1         | 0.017078955 |
| mmu.miR.762     | ILMN_1243652 | Tagln         | 0.017175901 |
| mmu.miR.93      | ILMN_1259787 | Osr1          | 0.017255487 |
| mmu.miR.325     | ILMN_1230271 | Anp32a        | 0.017301312 |
| mmu.miR.709     | ILMN_3125181 | Rfxank        | 0.017351412 |
| mmu.miR.339.5p  | ILMN_1224193 | Wnt5b         | 0.017351414 |
| mmu.miR.296.5p  | ILMN_1228132 | Lypla2        | 0.017367815 |
| mmu.miR.302a    | ILMN_1227514 | Pus3          | 0.017370998 |
| mmu.miR.322     | ILMN_1227815 | Idh3a         | 0.017597228 |
| mmu.miR.325     | ILMN_1224114 | Tmed1         | 0.017683735 |
| mmu.miR.335.3p  | ILMN_1258174 | Cse1l         | 0.017776743 |
| mmu.miR.1196    | ILMN_2728575 | Ankrd58       | 0.017798386 |
| mmu.miR.664     | ILMN_1248124 | Btg4          | 0.017808185 |
| mmu.miR.466i.5p | ILMN_2904686 | Cyb5r3        | 0.017826453 |
| mmu.miR.468     | ILMN_1225192 | Nfkbid        | 0.017830292 |
| mmu.miR.574.5p  | ILMN_2519345 | Vps45         | 0.017840613 |
| mmu.miR.1897.5p | ILMN_2708928 | Bdh1          | 0.017854263 |
| mmu.miR.669n    | ILMN_1248855 | Rint1         | 0.017857351 |

|                 |              |               |             |
|-----------------|--------------|---------------|-------------|
| mmu.miR.1a      | ILMN_1227728 | Osbp17        | 0.017922905 |
| mmu.miR.20a     | ILMN_1249578 | Sorl1         | 0.017949205 |
| mmu.miR.466n.3p | ILMN_2601974 | Sema7a        | 0.017959772 |
| mmu.miR.338.3p  | ILMN_1245103 | G6pc          | 0.017998774 |
| mmu.miR.200b    | ILMN_3160634 | Gm410         | 0.018009211 |
| mmu.miR.335.3p  | ILMN_1245650 | Sbds          | 0.018070197 |
| mmu.miR.712     | ILMN_2991339 | Zfp646        | 0.018209099 |
| mmu.miR.145     | ILMN_2768390 | Ntf5          | 0.018232541 |
| mmu.miR.669o.5p | ILMN_2804261 | Cald1         | 0.018270652 |
| mmu.miR.150     | ILMN_2851231 | Rpl9          | 0.018303134 |
| mmu.miR.106b    | ILMN_2653633 | Csm3          | 0.018344286 |
| mmu.miR.149     | ILMN_2690232 | BC068157      | 0.018386053 |
| mmu.let.7i      | ILMN_1214843 | Mettl6        | 0.018488898 |
| mmu.miR.3100.3p | ILMN_2937122 | Trak1         | 0.018501501 |
| mmu.miR.762     | ILMN_1217584 | Tubb5         | 0.018526974 |
| mmu.miR.466m.3p | ILMN_2725853 | Cdx2          | 0.018554858 |
| mmu.miR.466i.5p | ILMN_2643648 | Dbc1          | 0.018611085 |
| mmu.miR.181b    | ILMN_2706972 | Spata9        | 0.018895275 |
| mmu.miR.770.3p  | ILMN_2751304 | Ell           | 0.018916375 |
| mmu.miR.466f.3p | ILMN_2766704 | Fbxl21        | 0.018925973 |
| mmu.miR.337.3p  | ILMN_2612582 | Gjc2          | 0.018999552 |
| mmu.miR.1934    | ILMN_1228572 | Gpr108        | 0.019014282 |
| mmu.miR.1903    | ILMN_2948326 | Spr2i         | 0.019067384 |
| mmu.miR.470     | ILMN_1237644 | P2rx4         | 0.019087771 |
| mmu.miR.351     | ILMN_1234799 | Tmem120b      | 0.019184132 |
| mmu.miR.296.5p  | ILMN_2669991 | Tmem135       | 0.019256057 |
| mmu.miR.669h.3p | ILMN_3125113 | Cdh19         | 0.019259102 |
| mmu.miR.148b    | ILMN_1225770 | Epn2          | 0.01948637  |
| mmu.miR.713     | ILMN_2676066 | Stard7        | 0.019546276 |
| mmu.miR.149     | ILMN_2706231 | Syng2         | 0.019576713 |
| mmu.miR.26a     | ILMN_1242571 | Pkn3          | 0.01957772  |
| mmu.miR.3474    | ILMN_1248740 | Sema3f        | 0.019634401 |
| mmu.miR.466a.5p | ILMN_2950721 | 2810008M24Rik | 0.019740438 |
| mmu.miR.3084    | ILMN_2625299 | Sypl2         | 0.019769474 |
| mmu.miR.1949    | ILMN_1224022 | E130308A19Rik | 0.01977833  |
| mmu.miR.429     | ILMN_1227164 | Tubb5         | 0.019781954 |
| mmu.miR.3072    | ILMN_2672289 | Ptpn3         | 0.019907977 |
| mmu.miR.762     | ILMN_2479273 | Kcnt1         | 0.019991733 |
| mmu.miR.351     | ILMN_1231408 | Ngfr          | 0.02002732  |
| mmu.miR.181b    | ILMN_2686348 | Pkn3          | 0.020060251 |
| mmu.miR.883b.5p | ILMN_2458434 | Psg16         | 0.020063812 |
| mmu.miR.574.5p  | ILMN_2719513 | Slc39a8       | 0.020075925 |
| mmu.miR.328     | ILMN_1259956 | Barx1         | 0.020144675 |
| mmu.miR.320     | ILMN_1257110 | Gtf3c6        | 0.020169983 |
| mmu.miR.721     | ILMN_3029294 | Rab34         | 0.020333803 |
| mmu.miR.339.5p  | ILMN_1250064 | 6430550D23Rik | 0.020396604 |
| mmu.miR.322     | ILMN_2739825 | Dync1i1       | 0.020543423 |
| mmu.miR.15b     | ILMN_1236336 | Rbm6          | 0.020640557 |
| mmu.miR.2861    | ILMN_1254001 | Sharpin       | 0.020649202 |

|                 |              |               |             |
|-----------------|--------------|---------------|-------------|
| mmu.miR.126.5p  | ILMN_2660837 | St6galnac4    | 0.020765485 |
| mmu.miR.34a     | ILMN_2617441 | Stk11ip       | 0.020802749 |
| mmu.miR.497     | ILMN_2636143 | lfnk          | 0.020986866 |
| mmu.miR.200c    | ILMN_3105117 | 1200011M11Rik | 0.021265989 |
| mmu.miR.126.5p  | ILMN_2792028 | Gpx6          | 0.021287725 |
| mmu.miR.149     | ILMN_1227561 | Plcg1         | 0.021324122 |
| mmu.miR.27a     | ILMN_2754787 | Rsrc1         | 0.021357375 |
| mmu.miR.532.3p  | ILMN_1229985 | Exoc6b        | 0.021554622 |
| mmu.miR.1958    | ILMN_1232822 | Pdgfrl        | 0.02160874  |
| mmu.miR.15b     | ILMN_1236482 | Lhx3          | 0.02163228  |
| mmu.miR.466i.5p | ILMN_2923865 | Casp6         | 0.02180436  |
| mmu.miR.466d.5p | ILMN_1237974 | Kcng3         | 0.021931976 |
| mmu.miR.200c    | ILMN_1245063 | Mrgprb1       | 0.021948717 |
| mmu.miR.669n    | ILMN_2419777 | Ppm1l         | 0.022010066 |
| mmu.miR.1958    | ILMN_1216436 | 9930013L23Rik | 0.022102697 |
| mmu.miR.291a.5p | ILMN_2792502 | Il17d         | 0.022135616 |
| mmu.miR.25      | ILMN_2603958 | Gramd3        | 0.022168639 |
| mmu.miR.470     | ILMN_2690061 | Hnrpd1        | 0.022303442 |
| mmu.miR.30b     | ILMN_2742197 | Gabrb1        | 0.022369699 |
| mmu.miR.7a      | ILMN_2524276 | 6430704M03Rik | 0.022394543 |
| mmu.miR.107     | ILMN_2427874 | Capns2        | 0.022456646 |
| mmu.miR.497     | ILMN_1260455 | Lhx3          | 0.022495677 |
| mmu.miR.339.5p  | ILMN_1214985 | 4930579G22Rik | 0.022500192 |
| mmu.miR.194     | ILMN_2803368 | Zfp180        | 0.022509767 |
| mmu.miR.3103    | ILMN_1251296 | Elf2          | 0.022648343 |
| mmu.miR.5097    | ILMN_1240804 | Asxl3         | 0.022746547 |
| mmu.miR.1892    | ILMN_1227733 | Ndc80         | 0.022778547 |
| mmu.miR.106a    | ILMN_1249922 | Ppp1r3e       | 0.02280698  |
| mmu.miR.185     | ILMN_2948272 | Spc24         | 0.022845461 |
| mmu.miR.2861    | ILMN_2722353 | Pomgnt1       | 0.022871458 |
| mmu.miR.139.5p  | ILMN_1222499 | Slc33a1       | 0.022882299 |
| mmu.miR.340.5p  | ILMN_2985761 | Gm1322        | 0.022993258 |
| mmu.miR.329     | ILMN_2808751 | Bcl9          | 0.023069494 |
| mmu.miR.139.5p  | ILMN_1224507 | Gcm2          | 0.023099361 |
| mmu.miR.205     | ILMN_1228615 | Zfp366        | 0.023194731 |
| mmu.miR.709     | ILMN_1255311 | Elf2          | 0.023299113 |
| mmu.miR.1186    | ILMN_1256720 | Fbxl4         | 0.023376754 |
| mmu.miR.1196    | ILMN_2513895 | Sae1          | 0.023441408 |
| mmu.miR.335.3p  | ILMN_1214143 | Lyar          | 0.023591884 |
| mmu.miR.106b    | ILMN_2591570 | Stk11         | 0.023653537 |
| mmu.miR.20b     | ILMN_2910295 | Crim1         | 0.023666042 |
| mmu.miR.101b    | ILMN_1244291 | Gja1          | 0.023698963 |
| mmu.miR.351     | ILMN_2909283 | Tmem120b      | 0.02371118  |
| mmu.miR.1934    | ILMN_1250588 | Ptk7          | 0.023714176 |
| mmu.miR.466i.5p | ILMN_2507494 | Tmem141       | 0.023784236 |
| mmu.miR.466c.5p | ILMN_1231553 | Bdh1          | 0.023799516 |
| mmu.miR.881     | ILMN_2684378 | 4930534B04Rik | 0.023860339 |
| mmu.miR.126.5p  | ILMN_2429092 | Ybx1          | 0.023953888 |
| mmu.miR.207     | ILMN_1237983 | Padi2         | 0.023984363 |



|                 |              |               |             |
|-----------------|--------------|---------------|-------------|
| mmu.miR.322     | ILMN_2715114 | Crisp2        | 0.0240492   |
| mmu.miR.429     | ILMN_2620853 | Smgc          | 0.024130816 |
| mmu.miR.3473    | ILMN_2427705 | Ak7           | 0.024136509 |
| mmu.miR.693.5p  | ILMN_1215238 | Fsd2          | 0.024226211 |
| mmu.miR.1264.3p | ILMN_2708928 | Bdh1          | 0.024404174 |
| mmu.miR.1894.3p | ILMN_2927638 | Mxra8         | 0.024429413 |
| mmu.miR.320     | ILMN_1235783 | Acbd3         | 0.02445195  |
| mmu.miR.337.3p  | ILMN_1238852 | Taf12         | 0.02456142  |
| mmu.miR.429     | ILMN_2819319 | Rrm2          | 0.024561615 |
| mmu.miR.187     | ILMN_2897198 | Smok3b        | 0.024604133 |
| mmu.miR.503     | ILMN_1226962 | 1300010F03Rik | 0.024779222 |
| mmu.miR.1192    | ILMN_2445378 | Gcnt3         | 0.024925639 |
| mmu.miR.465b.5p | ILMN_1252294 | Eef2          | 0.02496041  |
| mmu.miR.351     | ILMN_2487847 | Uhrf1bp1      | 0.025029778 |
| mmu.miR.144     | ILMN_2637408 | Ccr1          | 0.025098399 |
| mmu.miR.466i.5p | ILMN_1252745 | Gtf2h2        | 0.02524921  |
| mmu.miR.1892    | ILMN_2628339 | Bin1          | 0.025407725 |
| mmu.miR.34a     | ILMN_1223381 | Padi2         | 0.025517421 |
| mmu.miR.325     | ILMN_2657356 | Lig1          | 0.025837185 |
| mmu.miR.322     | ILMN_2852979 | Adh5          | 0.025840731 |
| mmu.miR.20b     | ILMN_2826027 | Ube2q2        | 0.025923455 |
| mmu.miR.3068    | ILMN_1227889 | Pias3         | 0.025939995 |
| mmu.miR.337.3p  | ILMN_2686348 | Pknx2         | 0.026065515 |
| mmu.miR.669n    | ILMN_2659617 | Epn2          | 0.026104389 |
| mmu.miR.375     | ILMN_1241611 | Zfp39         | 0.026143494 |
| mmu.miR.466i.5p | ILMN_2655595 | Crcp          | 0.026225234 |
| mmu.miR.126.5p  | ILMN_2725781 | Abcg5         | 0.026260975 |
| mmu.miR.669h.3p | ILMN_1252745 | Gtf2h2        | 0.026620002 |
| mmu.miR.429     | ILMN_2666018 | Mgp           | 0.026643021 |
| mmu.miR.2861    | ILMN_1249339 | Rab4b         | 0.026693277 |
| mmu.miR.122     | ILMN_1252970 | Slc1a5        | 0.026819247 |
| mmu.miR.139.5p  | ILMN_2836494 | Ina           | 0.026879292 |
| mmu.miR.322     | ILMN_2584574 | 5430405G05Rik | 0.026941702 |
| mmu.miR.291a.5p | ILMN_2831273 | Mrpl51        | 0.026993141 |
| mmu.miR.325     | ILMN_1238893 | Lime1         | 0.027010294 |
| mmu.miR.712     | ILMN_2690551 | Nfkbie        | 0.027080668 |
| mmu.miR.1196    | ILMN_2982958 | Sae1          | 0.027127088 |
| mmu.miR.1892    | ILMN_2462431 | Wdr18         | 0.027132371 |
| mmu.miR.148b    | ILMN_2659617 | Epn2          | 0.027213208 |
| mmu.miR.1954    | ILMN_1244697 | Enah          | 0.027254696 |
| mmu.miR.1264.3p | ILMN_2663585 | Jdp2          | 0.027353379 |
| mmu.miR.338.5p  | ILMN_2583946 | Nxf1          | 0.027460141 |
| mmu.miR.148b    | ILMN_1238878 | Heph1         | 0.027499087 |
| mmu.miR.467h    | ILMN_2910653 | Bmp8a         | 0.02750666  |
| mmu.miR.1934    | ILMN_2660862 | Sepn1         | 0.027599921 |
| mmu.miR.126.5p  | ILMN_2769507 | Gpx6          | 0.027687881 |
| mmu.miR.1935    | ILMN_2918732 | Ugt3a1        | 0.027701876 |
| mmu.miR.466i.5p | ILMN_1255516 | 1810041L15Rik | 0.027783631 |
| mmu.miR.186     | ILMN_2648548 | Casp7         | 0.027853834 |



|                 |              |               |             |
|-----------------|--------------|---------------|-------------|
| mmu.miR.320     | ILMN_2637845 | Dhdds         | 0.027908042 |
| mmu.miR.466d.5p | ILMN_2923865 | Casp6         | 0.027919932 |
| mmu.miR.3069.5p | ILMN_2493851 | Sf1           | 0.02793506  |
| mmu.miR.691     | ILMN_3163148 | Ddhd1         | 0.027992661 |
| mmu.miR.214     | ILMN_2621422 | Kirrel        | 0.028011891 |
| mmu.miR.291a.5p | ILMN_2744337 | Cd47          | 0.028125759 |
| mmu.miR.665     | ILMN_2545978 | Ncaph2        | 0.028173629 |
| mmu.miR.669h.3p | ILMN_1251296 | Elf2          | 0.028325623 |
| mmu.miR.30b     | ILMN_2664365 | Ascc3         | 0.028333925 |
| mmu.miR.762     | ILMN_1229059 | Specc1        | 0.028348845 |
| mmu.miR.125a.5p | ILMN_1236482 | Lhx3          | 0.028366878 |
| mmu.miR.1186    | ILMN_2608238 | Dnaja3        | 0.028382652 |
| mmu.miR.214     | ILMN_3132318 | Rgs3          | 0.028481996 |
| mmu.miR.490.3p  | ILMN_2695936 | Fem1a         | 0.028634213 |
| mmu.miR.223     | ILMN_2766455 | Lrrc8d        | 0.028641194 |
| mmu.miR.144     | ILMN_3162470 | Aox3l1        | 0.028710304 |
| mmu.miR.470     | ILMN_1251608 | Gm904         | 0.028740403 |
| mmu.miR.470     | ILMN_2774965 | Hnrpd1        | 0.028990762 |
| mmu.miR.882     | ILMN_2803004 | C130022K22Rik | 0.029025008 |
| mmu.miR.669d    | ILMN_2617335 | Ndufb5        | 0.029033939 |
| mmu.miR.24      | ILMN_2484358 | Ppp1r3e       | 0.029095748 |
| mmu.miR.705     | ILMN_2504823 | Trim47        | 0.029100588 |
| mmu.miR.3102    | ILMN_2637203 | Rfc5          | 0.02919072  |
| mmu.miR.93      | ILMN_2792362 | Helb          | 0.029196061 |
| mmu.miR.466i.5p | ILMN_2637408 | Ccr11         | 0.02922508  |
| mmu.miR.186     | ILMN_1252745 | Gtf2h2        | 0.029249707 |
| mmu.miR.10b     | ILMN_1250704 | Rcsd1         | 0.029306203 |
| mmu.miR.770.3p  | ILMN_1235410 | Glt8d2        | 0.029376177 |
| mmu.miR.669h.3p | ILMN_1221594 | Pparg         | 0.02937716  |
| mmu.miR.374     | ILMN_2674643 | Tdo2          | 0.029475863 |
| mmu.miR.20a     | ILMN_2963223 | Rab22a        | 0.029504895 |
| mmu.miR.762     | ILMN_2625114 | Cdkal1        | 0.029557737 |
| mmu.miR.340.5p  | ILMN_2653633 | Csmd3         | 0.029667813 |
| mmu.miR.451     | ILMN_3043587 | Bex4          | 0.029810957 |
| mmu.miR.1949    | ILMN_1250467 | 1110034B05Rik | 0.029870418 |
| mmu.miR.1264.3p | ILMN_1218770 | Adam24        | 0.029873282 |
| mmu.miR.3100.3p | ILMN_1229161 | Eng           | 0.029931834 |
| mmu.miR.325     | ILMN_1237974 | Kcng3         | 0.029939195 |
| mmu.miR.770.3p  | ILMN_2827248 | Chat          | 0.029973121 |
| mmu.miR.1952    | ILMN_2745433 | Ergic1        | 0.03002199  |
| mmu.miR.149     | ILMN_2982736 | 1500031L02Rik | 0.030031361 |
| mmu.miR.1892    | ILMN_3163110 | Grik5         | 0.030083359 |
| mmu.miR.1264.3p | ILMN_1240178 | Ccndbp1       | 0.030191441 |
| mmu.miR.668     | ILMN_2966452 | BC048644      | 0.030219282 |
| mmu.miR.223     | ILMN_2725448 | Sytl3         | 0.030329788 |
| mmu.miR.101b    | ILMN_1224792 | Sltm          | 0.030408745 |
| mmu.miR.200c    | ILMN_3163053 | Comm3         | 0.030585748 |
| mmu.miR.466e.5p | ILMN_2486600 | 2810008M24Rik | 0.030592092 |
| mmu.miR.361     | ILMN_1220943 | Nup37         | 0.030648877 |

|                 |              |               |             |
|-----------------|--------------|---------------|-------------|
| mmu.miR.374     | ILMN_1225332 | Tmsb10        | 0.03066424  |
| mmu.miR.1903    | ILMN_2727116 | Sox4          | 0.030894756 |
| mmu.miR.1958    | ILMN_2684693 | Dusp3         | 0.03100701  |
| mmu.miR.20b     | ILMN_1249922 | Ppp1r3e       | 0.031147893 |
| mmu.miR.574.5p  | ILMN_3061615 | Cass4         | 0.031166238 |
| mmu.miR.93      | ILMN_1259494 | Sirt4         | 0.031195123 |
| mmu.miR.200b    | ILMN_1224022 | E130308A19Rik | 0.031198847 |
| mmu.miR.3082.5p | ILMN_2645719 | Tmem199       | 0.031199083 |
| mmu.miR.669e    | ILMN_1234694 | Zfp277        | 0.031215523 |
| mmu.miR.665     | ILMN_2904979 | Dus3l         | 0.031231628 |
| mmu.miR.429     | ILMN_1250241 | Csmd3         | 0.031249211 |
| mmu.miR.337.3p  | ILMN_2522818 | Tnfrsf22      | 0.031415841 |
| mmu.miR.505.5p  | ILMN_2708222 | Nlr1x1        | 0.031426356 |
| mmu.miR.709     | ILMN_1213200 | Med16         | 0.031442654 |
| mmu.miR.335.3p  | ILMN_2754787 | Rsrc1         | 0.031792163 |
| mmu.miR.1264.3p | ILMN_1231553 | Bdh1          | 0.031837656 |
| mmu.miR.713     | ILMN_1215832 | Csmd3         | 0.031976396 |
| mmu.miR.466a.5p | ILMN_2959360 | Klhdc8b       | 0.031998541 |
| mmu.miR.20a     | ILMN_1252745 | Gtf2h2        | 0.032025786 |
| mmu.miR.342.3p  | ILMN_3139354 | Sh2b1         | 0.032059822 |
| mmu.miR.3096.5p | ILMN_2910653 | Bmp8a         | 0.032066088 |
| mmu.miR.1892    | ILMN_2774825 | G3bp1         | 0.032127151 |
| mmu.miR.669c    | ILMN_2632890 | Atp5j         | 0.03218557  |
| mmu.miR.466i.5p | ILMN_2923707 | Tmem141       | 0.032216578 |
| mmu.miR.1954    | ILMN_2738837 | Nif3l1        | 0.03234261  |
| mmu.miR.186     | ILMN_2754787 | Rsrc1         | 0.032448113 |
| mmu.miR.3082.5p | ILMN_1215955 | Cyp2b10       | 0.032457134 |
| mmu.miR.145     | ILMN_1219587 | 1300010F03Rik | 0.032489767 |
| mmu.miR.142.3p  | ILMN_2770894 | Map3k6        | 0.032573866 |
| mmu.miR.30d     | ILMN_2637156 | Fpgt          | 0.032593219 |
| mmu.miR.466m.3p | ILMN_2447121 | Trim42        | 0.032740223 |
| mmu.miR.466f.3p | ILMN_3005080 | Clns1a        | 0.032803204 |
| mmu.miR.466i.5p | ILMN_1240237 | Syt15         | 0.032805802 |
| mmu.miR.185     | ILMN_2762026 | Pcna          | 0.032967195 |
| mmu.miR.667     | ILMN_2765981 | Krt26         | 0.033117514 |
| mmu.miR.1264.3p | ILMN_2665352 | Galk2         | 0.033342719 |
| mmu.miR.1935    | ILMN_1217753 | Srpk1         | 0.033434805 |
| mmu.miR.1894.3p | ILMN_2768396 | Kif5b         | 0.033442682 |
| mmu.miR.106a    | ILMN_2658067 | 1700001L19Rik | 0.033474941 |
| mmu.miR.1186    | ILMN_1251126 | Foxp3         | 0.033566422 |
| mmu.miR.1954    | ILMN_2636855 | Enah          | 0.033567643 |
| mmu.miR.20b     | ILMN_1259787 | Osr1          | 0.033585774 |
| mmu.miR.291a.5p | ILMN_2701570 | Zc3hc1        | 0.033601606 |
| mmu.miR.669i    | ILMN_1224410 | Pcdhb11       | 0.033621569 |
| mmu.miR.329     | ILMN_2692657 | Ighmbp2       | 0.03378444  |
| mmu.miR.3100.3p | ILMN_1256492 | Anxa6         | 0.033820928 |
| mmu.miR.678     | ILMN_2749471 | Fut8          | 0.033907255 |
| mmu.miR.466a.5p | ILMN_1219072 | Flt4          | 0.033933668 |
| mmu.miR.3100.3p | ILMN_2699700 | Arpc1a        | 0.033985731 |

|                 |              |               |             |
|-----------------|--------------|---------------|-------------|
| mmu.miR.470     | ILMN_2473337 | Tmed10        | 0.034091746 |
| mmu.miR.142.5p  | ILMN_1216713 | Mrpl15        | 0.034098118 |
| mmu.let.7a      | ILMN_1236008 | Isoc2a        | 0.034294287 |
| mmu.miR.223     | ILMN_2615575 | 5031414D18Rik | 0.034303445 |
| mmu.miR.122     | ILMN_2545178 | Matk          | 0.034563463 |
| mmu.miR.470     | ILMN_1226325 | Cnm2          | 0.034654126 |
| mmu.miR.690     | ILMN_1220793 | Rbm4b         | 0.034704204 |
| mmu.miR.1954    | ILMN_2733843 | Dmrt1         | 0.034837024 |
| mmu.miR.340.5p  | ILMN_1225770 | Epn2          | 0.035078528 |
| mmu.miR.126.5p  | ILMN_2770381 | Cd80          | 0.035128816 |
| mmu.miR.1892    | ILMN_1249301 | Bckdk         | 0.035215153 |
| mmu.miR.29a     | ILMN_2810882 | Ppic          | 0.035285201 |
| mmu.miR.712     | ILMN_2604056 | Nsun5         | 0.035376322 |
| mmu.miR.3082.5p | ILMN_1216110 | Slc35d3       | 0.03557518  |
| mmu.miR.291a.5p | ILMN_2756474 | Amz1          | 0.035589463 |
| mmu.miR.497     | ILMN_2686393 | Gna12         | 0.03562127  |
| mmu.miR.1935    | ILMN_2806290 | Kbtbd4        | 0.035668894 |
| mmu.miR.31      | ILMN_2476452 | Cpm           | 0.035729325 |
| mmu.miR.149     | ILMN_2652414 | Ncald         | 0.035743333 |
| mmu.miR.466e.5p | ILMN_1225281 | Dsg4          | 0.035769843 |
| mmu.miR.337.3p  | ILMN_2428961 | Xpnpep1       | 0.035849333 |
| mmu.miR.3068    | ILMN_2685856 | Myo15         | 0.035856699 |
| mmu.miR.320     | ILMN_3142248 | Phc1          | 0.035904673 |
| mmu.miR.3100.3p | ILMN_2568578 | Tbxas1        | 0.035968345 |
| mmu.miR.152     | ILMN_1244006 | Epn2          | 0.03599471  |
| mmu.miR.337.3p  | ILMN_2789125 | Stard7        | 0.036018514 |
| mmu.miR.181a    | ILMN_2717079 | Hoxa11        | 0.036042779 |
| mmu.miR.26a     | ILMN_1248268 | Zfp709        | 0.036057662 |
| mmu.miR.374     | ILMN_2720352 | Cfhr1         | 0.03611338  |
| mmu.miR.23a     | ILMN_2658107 | Zc3h13        | 0.036147813 |
| mmu.miR.712     | ILMN_2655273 | Slu7          | 0.036220274 |
| mmu.miR.92b     | ILMN_2596821 | 1810024B03Rik | 0.036231461 |
| mmu.miR.144     | ILMN_2684222 | Ddx59         | 0.036247022 |
| mmu.miR.106b    | ILMN_2661558 | Spinlw1       | 0.036330115 |
| mmu.miR.26a     | ILMN_1259769 | Pabpc1        | 0.036380153 |
| mmu.miR.224     | ILMN_1216425 | Tmem174       | 0.036626788 |
| mmu.miR.709     | ILMN_2689678 | Ddx54         | 0.036653473 |
| mmu.miR.338.5p  | ILMN_1216713 | Mrpl15        | 0.036692503 |
| mmu.miR.1958    | ILMN_2894450 | Snx15         | 0.036702021 |
| mmu.miR.1903    | ILMN_2634742 | S100b         | 0.036920953 |
| mmu.miR.712     | ILMN_2811775 | 4930428D18Rik | 0.036925399 |
| mmu.miR.875.3p  | ILMN_2711978 | Tead4         | 0.036947677 |
| mmu.miR.3100.3p | ILMN_2597686 | Rrbp1         | 0.036968431 |
| mmu.miR.155     | ILMN_1244180 | lrf2bp2       | 0.037000713 |
| mmu.miR.466f.3p | ILMN_2750062 | Arhgap24      | 0.037139724 |
| mmu.miR.3084    | ILMN_2811240 | Tprkb         | 0.037199026 |
| mmu.miR.712     | ILMN_1224380 | Gosr2         | 0.037199916 |
| mmu.miR.505.5p  | ILMN_2958484 | Nlrx1         | 0.037210742 |
| mmu.miR.325     | ILMN_2792868 | Blvrb         | 0.037299098 |

|                 |              |               |             |
|-----------------|--------------|---------------|-------------|
| mmu.miR.465b.5p | ILMN_2458275 | Ubap1         | 0.037331109 |
| mmu.miR.324.3p  | ILMN_2706906 | LOC100047937  | 0.037350322 |
| mmu.miR.24      | ILMN_2998934 | Cited4        | 0.037574468 |
| mmu.miR.882     | ILMN_2762026 | Pcna          | 0.037608979 |
| mmu.miR.126.5p  | ILMN_2596441 | Magea5        | 0.037621652 |
| mmu.miR.1949    | ILMN_2605094 | Rsl1d1        | 0.03793723  |
| mmu.miR.340.5p  | ILMN_3137956 | E130308A19Rik | 0.037971468 |
| mmu.miR.30b     | ILMN_2754569 | Ccdc15        | 0.038053936 |
| mmu.miR.1264.3p | ILMN_3115826 | Esr2          | 0.038101504 |
| mmu.miR.762     | ILMN_2649818 | Specc1        | 0.038118837 |
| mmu.miR.195     | ILMN_2649955 | Tarbp2        | 0.038179023 |
| mmu.miR.1929    | ILMN_3147584 | Fads3         | 0.038209514 |
| mmu.miR.296.5p  | ILMN_2959976 | Tom1          | 0.038225943 |
| mmu.miR.466m.3p | ILMN_2602607 | 1810037117Rik | 0.038320663 |
| mmu.miR.142.5p  | ILMN_2445378 | Gcnt3         | 0.03835935  |
| mmu.miR.325     | ILMN_1212739 | Hgd           | 0.03837001  |
| mmu.miR.466f.3p | ILMN_2640961 | Acyp1         | 0.038380138 |
| mmu.miR.466d.5p | ILMN_2499746 | Trim27        | 0.038491114 |
| mmu.miR.883b.5p | ILMN_2546004 | 1300010F03Rik | 0.038506432 |
| mmu.miR.762     | ILMN_2813484 | Per1          | 0.038607612 |
| mmu.miR.467e    | ILMN_2804261 | Cald1         | 0.038684762 |
| mmu.miR.205     | ILMN_2786125 | Zfp758        | 0.03875841  |
| mmu.miR.466m.3p | ILMN_2672147 | Slc17a4       | 0.038761144 |
| mmu.miR.466f    | ILMN_1255190 | C1rl          | 0.038944742 |
| mmu.miR.466n.3p | ILMN_2599692 | Gldn          | 0.039014509 |
| mmu.miR.762     | ILMN_2712668 | Pfkfb4        | 0.039137573 |
| mmu.miR.466m.3p | ILMN_2667020 | Ryk           | 0.039156156 |
| mmu.miR.465b.5p | ILMN_2739989 | 4930534B04Rik | 0.03921457  |
| mmu.miR.297c    | ILMN_1238102 | Ide           | 0.039252725 |
| mmu.miR.374     | ILMN_1245031 | Pak1ip1       | 0.03937454  |
| mmu.miR.152     | ILMN_1241611 | Zfp39         | 0.039405139 |
| mmu.miR.669n    | ILMN_2769153 | 4930455F23Rik | 0.039484275 |
| mmu.miR.465b.5p | ILMN_1239110 | Eef2          | 0.039581564 |
| mmu.miR.1961    | ILMN_3128363 | Slc14a2       | 0.039642951 |
| mmu.miR.677     | ILMN_2702159 | Clec4f        | 0.039683995 |
| mmu.miR.468     | ILMN_2620994 | Bhmt          | 0.03984262  |
| mmu.miR.5097    | ILMN_1252745 | Gtf2h2        | 0.039897081 |
| mmu.miR.3100.3p | ILMN_2744337 | Cd47          | 0.039958947 |
| mmu.miR.1954    | ILMN_2457326 | Tssc1         | 0.039974625 |
| mmu.miR.3473    | ILMN_1234480 | Hsd3b2        | 0.040050655 |
| mmu.miR.1900    | ILMN_2756041 | Pkm2          | 0.040111418 |
| mmu.miR.98      | ILMN_3128363 | Slc14a2       | 0.040191937 |
| mmu.miR.297a    | ILMN_2746906 | Nudt19        | 0.040207718 |
| mmu.miR.881     | ILMN_1230321 | Cdh19         | 0.040246282 |
| mmu.miR.669h.3p | ILMN_2617925 | Dhx57         | 0.040461955 |
| mmu.miR.1903    | ILMN_2741563 | Samd7         | 0.040516453 |
| mmu.miR.1958    | ILMN_2834850 | Fkbp3         | 0.040613726 |
| mmu.miR.497     | ILMN_2514292 | Zyx           | 0.040738371 |
| mmu.miR.883a.5p | ILMN_2874409 | Fadd          | 0.040821675 |

|                 |              |          |             |
|-----------------|--------------|----------|-------------|
| mmu.miR.3098.3p | ILMN_1237338 | Ddx25    | 0.040894976 |
| mmu.miR.1196    | ILMN_2423789 | Sae1     | 0.040922198 |
| mmu.miR.24      | ILMN_2968369 | Kcnip1   | 0.040932311 |
| mmu.miR.497     | ILMN_2768905 | Mink1    | 0.040975514 |
| mmu.miR.710     | ILMN_1248124 | Btg4     | 0.041083471 |
| mmu.miR.1961    | ILMN_1236008 | Isoc2a   | 0.041231485 |
| mmu.miR.325     | ILMN_2949869 | Ift88    | 0.041341872 |
| mmu.miR.883a.5p | ILMN_2658786 | Cxcr3    | 0.041419381 |
| mmu.miR.677     | ILMN_2923736 | Txndc15  | 0.041558968 |
| mmu.miR.142.5p  | ILMN_2603647 | Clec2d   | 0.041594228 |
| mmu.miR.693.5p  | ILMN_3064382 | Phc1     | 0.04166055  |
| mmu.miR.1903    | ILMN_1235447 | Nlrc4    | 0.041684551 |
| mmu.let.7b      | ILMN_1260233 | Klh6     | 0.04169417  |
| mmu.miR.767     | ILMN_2762672 | Cacna2d3 | 0.041785782 |
| mmu.miR.150     | ILMN_1260219 | Adipor2  | 0.0417933   |
| mmu.miR.101b    | ILMN_1254579 | Crisp4   | 0.041909104 |
| mmu.miR.693.5p  | ILMN_1213518 | Ivd      | 0.041983947 |
| mmu.miR.5097    | ILMN_2740134 | Idh3a    | 0.04206437  |
| mmu.miR.34a     | ILMN_1237983 | Padi2    | 0.042092424 |
| mmu.miR.142.3p  | ILMN_1227552 | Itga8    | 0.042172817 |
| mmu.miR.224     | ILMN_2478649 | Myot     | 0.042183447 |
| mmu.miR.339.5p  | ILMN_2741421 | Dkk4     | 0.042237934 |
| mmu.miR.883a.5p | ILMN_1231705 | Tmem48   | 0.042239168 |
| mmu.miR.207     | ILMN_2923717 | Kcnt1    | 0.04240843  |
| mmu.miR.721     | ILMN_2908547 | Arfgap1  | 0.042506841 |
| mmu.miR.3098.3p | ILMN_2977849 | Fank1    | 0.042563628 |
| mmu.let.7b      | ILMN_3149680 | Fbxl12   | 0.042625447 |
| mmu.miR.497     | ILMN_2669991 | Tmem135  | 0.042715065 |
| mmu.miR.3096.5p | ILMN_1247506 | Saa4     | 0.042754073 |
| mmu.miR.10a     | ILMN_2617335 | Ndufb5   | 0.04276762  |
| mmu.miR.706     | ILMN_1240344 | Gpr152   | 0.042821891 |
| mmu.miR.20b     | ILMN_1252745 | Gtf2h2   | 0.0429642   |
| mmu.miR.3084    | ILMN_2606498 | Tapbpl   | 0.042991528 |
| mmu.miR.142.3p  | ILMN_2687881 | Rab23    | 0.043326595 |
| mmu.miR.291a.5p | ILMN_2681248 | Myo3b    | 0.043369462 |
| mmu.miR.1192    | ILMN_2558874 | Clcn5    | 0.043373184 |
| mmu.miR.150     | ILMN_2740259 | Myh1     | 0.043377959 |
| mmu.miR.30b     | ILMN_1221901 | Dock7    | 0.043431226 |
| mmu.miR.466n.3p | ILMN_1254073 | Cald1    | 0.043489288 |
| mmu.miR.20b     | ILMN_2749911 | Ube2q2   | 0.043526321 |
| mmu.miR.669n    | ILMN_2647197 | Rasd1    | 0.043580074 |
| mmu.miR.466f.3p | ILMN_3040693 | Lamc3    | 0.043614433 |
| mmu.miR.20a     | ILMN_2484358 | Ppp1r3e  | 0.043797102 |
| mmu.miR.470     | ILMN_2637156 | Fpgt     | 0.044122605 |
| mmu.miR.466i.5p | ILMN_2712873 | Cyb5r3   | 0.044155327 |
| mmu.miR.181b    | ILMN_1221901 | Dock7    | 0.04415705  |
| mmu.miR.325     | ILMN_3002181 | Ppif     | 0.044224521 |
| mmu.miR.1892    | ILMN_2706251 | Cxxc1    | 0.044319685 |
| mmu.miR.712     | ILMN_2696272 | Tmem185b | 0.044392251 |

|                 |              |               |             |
|-----------------|--------------|---------------|-------------|
| mmu.miR.106b    | ILMN_1245103 | G6pc          | 0.044414082 |
| mmu.miR.468     | ILMN_1214369 | Nfe2l2        | 0.044499381 |
| mmu.miR.1192    | ILMN_2767216 | Actc1         | 0.044524791 |
| mmu.miR.3068    | ILMN_2631014 | Pias3         | 0.044811593 |
| mmu.miR.337.3p  | ILMN_2424555 | Zkscan6       | 0.044816176 |
| mmu.miR.5097    | ILMN_1224318 | Kctd3         | 0.04500636  |
| mmu.miR.374     | ILMN_2662776 | Mpdz          | 0.045044202 |
| mmu.miR.3082.5p | ILMN_1234514 | Klhl22        | 0.045095452 |
| mmu.miR.338.5p  | ILMN_1224076 | 2810453I06Rik | 0.045164783 |
| mmu.miR.1186    | ILMN_2637466 | Uspl1         | 0.045181107 |
| mmu.miR.149     | ILMN_3057208 | Slc35c1       | 0.045229302 |
| mmu.miR.329     | ILMN_2799163 | 4930596D02Rik | 0.045260361 |
| mmu.miR.668     | ILMN_1222853 | Cdh3          | 0.045306551 |
| mmu.miR.339.5p  | ILMN_1237163 | Kif15         | 0.045434724 |
| mmu.miR.223     | ILMN_2819319 | Rrm2          | 0.045449474 |
| mmu.miR.466f.3p | ILMN_2649083 | Clns1a        | 0.045514895 |
| mmu.miR.149     | ILMN_2794460 | Ncoa5         | 0.045519493 |
| mmu.miR.25      | ILMN_1248758 | Rfx1          | 0.04560674  |
| mmu.miR.291a.5p | ILMN_3160517 | Cox17         | 0.04560677  |
| mmu.miR.338.3p  | ILMN_2692657 | Ighmbp2       | 0.045611782 |
| mmu.miR.125a.5p | ILMN_2923717 | Kcnt1         | 0.04575568  |
| mmu.miR.374     | ILMN_2620406 | Nptx2         | 0.045762602 |
| mmu.miR.1958    | ILMN_1246058 | Ppp1ca        | 0.045875462 |
| mmu.miR.466f.3p | ILMN_2879382 | Med10         | 0.04593187  |
| mmu.miR.122     | ILMN_2756041 | Pkm2          | 0.045948254 |
| mmu.miR.326     | ILMN_1255516 | 1810041L15Rik | 0.045973166 |
| mmu.miR.144     | ILMN_1224128 | Nfe2l2        | 0.046008045 |
| mmu.miR.720     | ILMN_2660663 | Ak2           | 0.046262398 |
| mmu.miR.669h.3p | ILMN_1220401 | Gtf2h2        | 0.046385651 |
| mmu.miR.3473    | ILMN_1247131 | 2310044H10Rik | 0.046480956 |
| mmu.miR.669n    | ILMN_1228615 | Zfp366        | 0.046485058 |
| mmu.miR.1958    | ILMN_1220336 | Tmc1          | 0.046570103 |
| mmu.miR.691     | ILMN_2762823 | Npc1          | 0.046873855 |
| mmu.miR.1264.3p | ILMN_1249606 | Rpl7l1        | 0.046938045 |
| mmu.miR.181a    | ILMN_2719702 | Rasl10a       | 0.046972153 |
| mmu.miR.194     | ILMN_1252526 | Zswim3        | 0.047019201 |
| mmu.miR.34b.5p  | ILMN_2815024 | Fut8          | 0.047052918 |
| mmu.miR.149     | ILMN_2511768 | Ttc17         | 0.047417403 |
| mmu.miR.466i.5p | ILMN_1237967 | Nol3          | 0.047550102 |
| mmu.miR.1196    | ILMN_1250088 | 4921524J17Rik | 0.047551678 |
| mmu.miR.93      | ILMN_1221587 | Ppp1r3e       | 0.047577708 |
| mmu.miR.875.3p  | ILMN_2599986 | Tead4         | 0.047625927 |
| mmu.miR.875.3p  | ILMN_2999670 | St8sia5       | 0.047739884 |
| mmu.miR.130a    | ILMN_3029294 | Rab34         | 0.047743509 |
| mmu.miR.713     | ILMN_2611159 | Stard7        | 0.047765258 |
| mmu.miR.106b    | ILMN_2624544 | Helb          | 0.047779184 |
| mmu.miR.126.5p  | ILMN_1255644 | Atn1          | 0.047857583 |
| mmu.miR.762     | ILMN_2773330 | Casq1         | 0.047913639 |
| mmu.miR.693.5p  | ILMN_2728038 | Arhgap24      | 0.04794294  |

|                 |              |               |             |
|-----------------|--------------|---------------|-------------|
| mmu.miR.3474    | ILMN_2711329 | Ccdc40        | 0.047962469 |
| mmu.miR.3068    | ILMN_2511768 | Ttc17         | 0.047983279 |
| mmu.miR.125b.5p | ILMN_2589790 | Stat3         | 0.047998059 |
| mmu.miR.297a    | ILMN_2666677 | Cel           | 0.048139743 |
| mmu.miR.710     | ILMN_2686348 | Pknox2        | 0.0482301   |
| mmu.miR.302a    | ILMN_2624544 | Helb          | 0.048258983 |
| mmu.miR.148b    | ILMN_1220235 | B4galt5       | 0.048348276 |
| mmu.miR.883b.5p | ILMN_1216279 | Irf6          | 0.048580959 |
| mmu.miR.669m.3p | ILMN_2434327 | Ugt2a1        | 0.04869135  |
| mmu.miR.151.3p  | ILMN_1236529 | Spata16       | 0.048704851 |
| mmu.miR.126.5p  | ILMN_1222902 | Cdan1         | 0.048750062 |
| mmu.miR.21      | ILMN_2985761 | Gm1322        | 0.049039477 |
| mmu.miR.706     | ILMN_2586510 | Pik3c2g       | 0.049111896 |
| mmu.miR.142.5p  | ILMN_1214369 | Nfe2l2        | 0.049191851 |
| mmu.miR.466d.5p | ILMN_2507494 | Tmem141       | 0.049224117 |
| mmu.miR.30a     | ILMN_2896341 | Zfp709        | 0.049235698 |
| mmu.miR.324.3p  | ILMN_2641360 | Ak2           | 0.049249798 |
| mmu.miR.2861    | ILMN_2440602 | Tlr5          | 0.049267923 |
| mmu.let.7c      | ILMN_3070975 | Fbxl12        | 0.049411086 |
| mmu.miR.706     | ILMN_2510467 | Sco1          | 0.049648868 |
| mmu.miR.883b.5p | ILMN_1223516 | E130309F12Rik | 0.049692324 |
| mmu.let.7g      | ILMN_1224697 | Fbxl12        | 0.049860446 |
| mmu.miR.207     | ILMN_1244460 | Efna1         | 0.04987117  |
| mmu.miR.290.5p  | ILMN_3147584 | Fads3         | 0.049997259 |
