# Supplementary material
Source: HighWire-hosted journal article supplement (https://thorax.bmj.com/content/thoraxjnl-2019-213561)

## Supplemental Figure 1

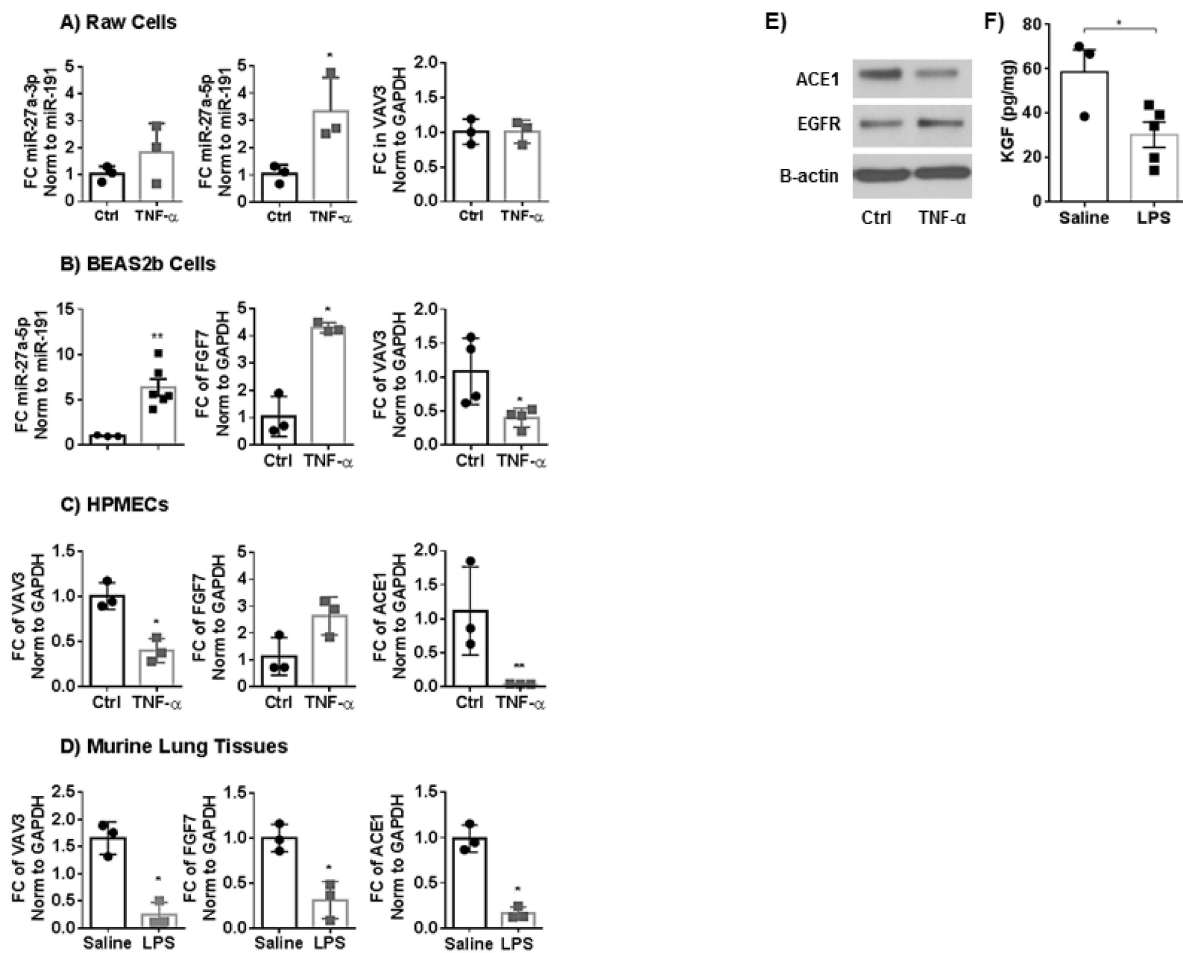

Supplement: inline-supplementary-material-3 [file inline-supplementary-material-3.pdf]

## Supplemental Figure 2

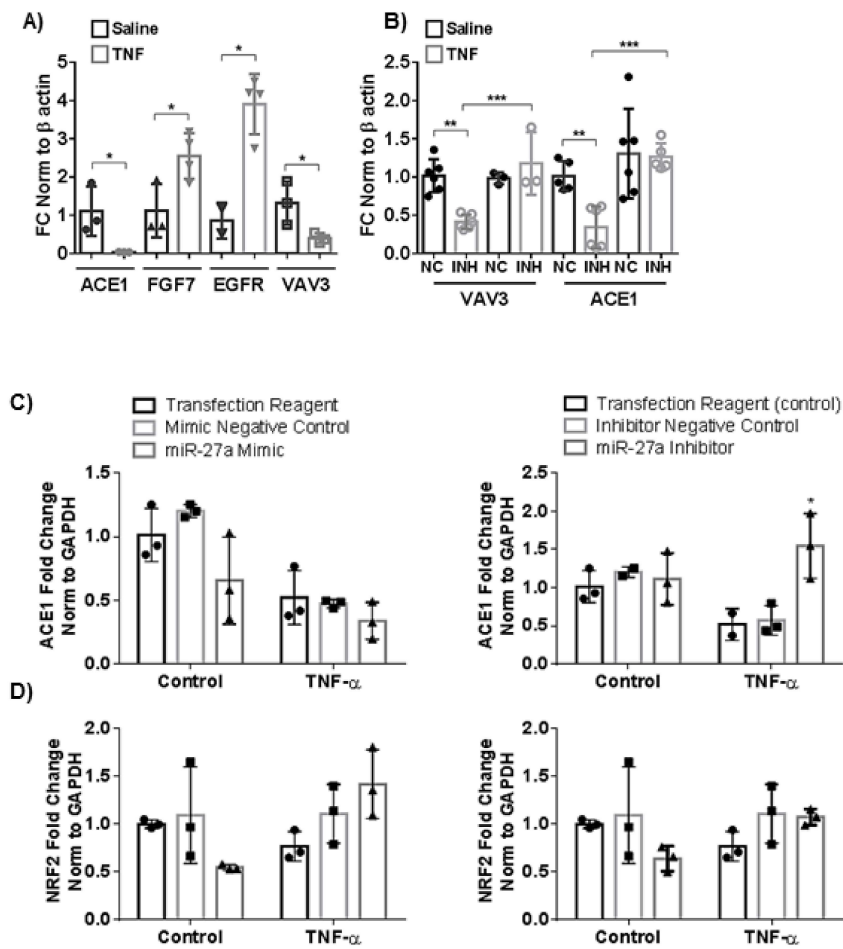

Supplement: inline-supplementary-material-4 [file inline-supplementary-material-4.pdf]

Supplemental Figure 3

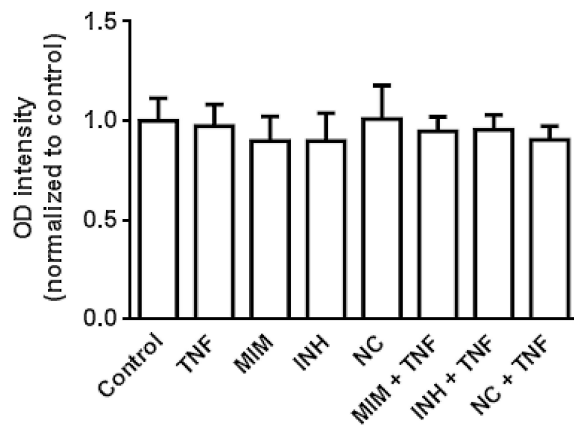

Supplement: inline-supplementary-material-5 [file inline-supplementary-material-5.pdf]

## Supplemental Figure 4

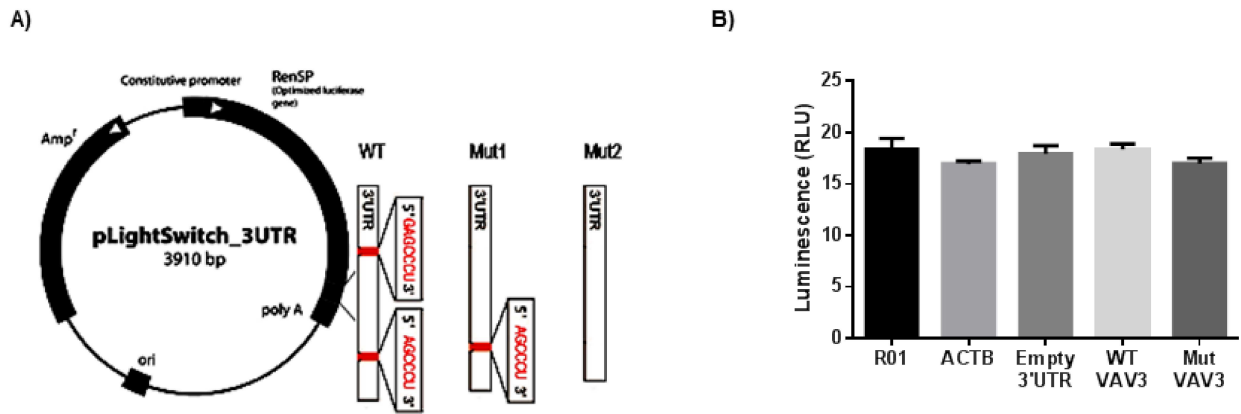

Supplement: inline-supplementary-material-6 [file inline-supplementary-material-6.pdf]
